## Membrane Env liposomes for immunization with HIV spikes

Daniel P. Leaman<sup>1</sup>, Armando Stano<sup>1,a</sup>, Yajing Chen<sup>1,b</sup>, Lei Zhang<sup>1,c</sup> and Michael B. Zwick<sup>1,\*</sup>

<sup>1</sup>Department of Immunology and Microbiology, The Scripps Research Institute, La Jolla, CA, USA.

<sup>a</sup> Present address: Antharis Therapeutics, San Diego, CA, USA.

<sup>b</sup> Present address: Sorrento Therapeutics, San Diego, CA, USA.

<sup>c</sup> Present address: CTK Biotech, Poway, CA, USA.

\*Address correspondence to Michael B. Zwick, [zwick@scripps.edu](mailto:zwick@scripps.edu).

1 **Abstract**

2

3 A key goal in HIV vaccine design remains to elicit broadly neutralizing antibodies (bnAbs)  
4 against the membrane-embedded envelope glycoprotein spike (mEnv). However, mEnv has  
5 lagged behind engineered soluble Envs in vaccine development due to low expression yields and  
6 the presence of extraneous proteins on particles. Here, we describe a mEnv vaccine platform that  
7 requires no extra proteins or protein engineering. MEnv trimers were fixed, purified and  
8 combined with liposomes in mild detergent. On removal of detergent, mEnvs were observed  
9 embedded in particles, designated mEnv liposomes (MELs), which were recognized by HIV  
10 bnAbs but not non-nAbs. Following sequential immunization in rabbits, MEL antisera  
11 neutralized select tier 2 HIV isolates. Variations between the Env immunogens, including a  
12 missing N-glycosylation site at position 197 near the CD4 binding site, provide insights into the  
13 specificities elicited and possible ways to improve immunogens. MELs can facilitate vaccine  
14 design to elicit HIV bnAbs using biochemically defined and multimerized mEnv.

## 15 **Introduction**

16 HIV/AIDS afflicts more than 38 million people worldwide and is currently without a practical  
17 cure (UNAIDS, 2020). Modest efficacy of a vaccine against HIV infection has been correlated to  
18 the activity of certain non-neutralizing antibodies in humans (Rerks-Ngarm et al., 2009; Tomaras  
19 & Plotkin, 2017). However, to effectively curb the pandemic that involves a high diversity of  
20 circulating viral isolates, a vaccine most likely will need to reproducibly elicit HIV broadly  
21 neutralizing antibodies (bnAbs), something which described vaccines have failed to do  
22 (Bjorkman, 2020; Haynes, Burton, & Mascola, 2019).

23 HIV bnAbs must recognize the envelope glycoprotein trimeric spike in its membrane-embedded  
24 state (mEnv). Many early vaccines consisted of glycoprotein (gp) subunits of Env, *e.g.* gp120  
25 outer subunit, gp160 precursor, or soluble gp140s that were uncleaved by furin and devoid of the  
26 transmembrane (TM) domain and C-terminal tail (CTT) of subunit gp41 (Spearman, 2006).  
27 These subunit vaccines elicited antibodies with limited neutralization activity that targeted  
28 variable epitopes (Gilbert et al., 2010; Mascola et al., 1996; Spearman et al., 2011; Yang, Wyatt,  
29 & Sodroski, 2001), but they lacked well-ordered trimeric structure and were missing important  
30 bnAb epitopes (Ringe et al., 2013).

31 More recently, soluble (s)Env gp140s have been engineered with trimer stabilizing mutations,  
32 *e.g.* SOSIP (Sanders et al., 2013; Sanders et al., 2002), UFO (Kong et al., 2016), and NFL  
33 (Sharma et al., 2015), that reasonably mimic the structure of mEnv, recapitulate quaternary bnAb  
34 epitopes and occlude many non-nAb epitopes (Julien et al., 2013; Lee, Ozorowski, & Ward,  
35 2016; Stadtmueller et al., 2018). Immunization with these sEnvs has elicited nAbs against  
36 relatively resistant (tier 2) primary viruses that often target variable loops or gaps in Env's  
37 glycan shield (Crooks et al., 2015; Hessel et al., 2016; McCoy et al., 2016; Sanders et al., 2015).  
38 NAb responses have been enhanced in some cases in which sEnv immunogens were chemically  
39 crosslinked (Dubrovskaya et al., 2019; Leaman, Lee, Ward, & Zwick, 2015; Schiffner et al.,  
40 2018), multimerized on nanoparticles or liposomes (Bale et al., 2017; McGuire et al., 2016;  
41 Morris et al., 2017), and/or engineered with certain N-linked glycosylation site mutations. A  
42 sequential prime-boost regimen using such approaches has recently elicited sporadic titers of  
43 bnAb (Dubrovskaya et al., 2019).

44 Immunization with sEnvs often elicits disproportionately high titers of non-nAbs to the truncated  
45 base (Bale et al., 2017; Hu et al., 2015) while key epitopes of bnAbs 2F5, 4E10 and 10E8 against  
46 the membrane-proximal external region (MPER) are either disrupted or missing (Krebs et al.,  
47 2019; Zhang et al., 2019). Differences in conformational dynamics between sEnv and native  
48 mEnv have also been reported (Lu et al., 2019). Virus-like particles (VLPs) displaying mEnv  
49 have been used as immunogens but may elicit off-target or distracting antibody responses to Env  
50 debris or extraneous proteins from the virus and the host cell, which may also be autoreactive  
51 (Cantin, Methot, & Tremblay, 2005; Crooks et al., 2007; Leaman et al., 2015; Poon, Hsu,  
52 Gudeman, Chen, & Grovit-Ferbas, 2005). Genetic vaccines such as mRNA vaccines have gained  
53 recent attention as a promising platform (Pardi, Hogan, Porter, & Weissman, 2018), but do not  
54 allow control over the conformation, density, as well as quality of the protein produced and does  
55 not allow crosslinking for added stability. Hence, a suitable mEnv vaccine alternative is desirable  
56 that addresses the above concerns, to diversify approaches and enable new hypotheses.

57 Here, we developed a vaccine platform that displays multivalent, well-ordered mEnv spikes on  
58 liposomes, termed MELs. MEnv was purified readily from cell lines (Stano et al., 2017) and  
59 assembled into liposomes with MPER exposed and CTT buried. Notably, MELs were devoid of  
60 extraneous proteins and displayed stable, crosslinked mEnv trimers in a multivalent array. In an  
61 immunization experiment, MELs elicited antibodies that neutralized select tier 2 isolates of HIV.  
62 Hence, MELs should be a useful platform for rational HIV vaccine design involving mEnv.

63

## 64 **Results**

### 65 **Generation of fixed mEnv spikes.**

66 We previously described an HIV Env nanoparticle immunogen in which mEnv was captured on  
67 antibody-coated nanobeads (Leaman et al., 2015). In that approach, the capture antibody was an  
68 undesirable vaccine component, and mEnv yields were low from the transient transfection of  
69 cells. Here, we took advantage of a recently described stable cell line strategy that increased  
70 mEnv yield by more than 10-fold (Stano et al., 2017). The mEnv of this cell line is a variant of  
71 the clade B isolate ADA, termed Comb-mut (ADA.CM), which was previously selected for high  
72 trimer stability (Leaman & Zwick, 2013). We also generated two new mEnv cell lines,

73 JRFL.TD15 and CH505.N197D, to produce mutant Envs of a clade B isolate and a clade C  
74 transmitted/founder (T/F) isolate, respectively, as will be described further below.

75 MEnv-expressing cells were fixed in glutaraldehyde (GA), a clinically approved chemical  
76 crosslinker shown previously to have helped in eliciting HIV nAbs (Schiffner et al., 2018;  
77 Soldemo et al., 2017). Fixed cells were solubilized in the detergent n-dodecyl- $\beta$ -D-maltoside  
78 (DDM) and mEnv was affinity purified using the trimer specific antibody PGT151. Size  
79 exclusion chromatography of purified mEnv revealed two major peaks, the first being aggregated  
80 mEnv, while the second was trimeric mEnv that was used for subsequent biophysical studies  
81 (**Supp. Fig. 1A-B**). Purified mEnvs ADA.CM, CH505.N197D and JRFL.TD15 were verified to  
82 be trimeric using blue native (BN)-PAGE and denaturing SDS-PAGE (**Fig. 1A** and **Supp. Fig.**  
83 **1B**). The trimers were recognized by several bnAbs to gp120 and gp41, including those to  
84 quaternary epitopes, and showed minimal binding by non-nAbs (**Fig. 1B**). These data show the  
85 mEnvs are stable, trimeric and have native-like antigenicity. Of note, mEnvs were produced in  
86 yields sufficient for immunizations, *i.e.*, ~0.5 mg of pure mEnv per liter of culture medium.

### 87 **Incorporation of mEnv into liposomes.**

88 To see if mEnv could incorporate into liposomes, we adopted an approach described for making  
89 proteoliposomes (**Fig. 2A**) (Geertsma, Nik Mahmood, Schuurman-Wolters, & Poolman, 2008;  
90 Seddon, Curnow, & Booth, 2004). Thus, naked liposomes (70% POPC, 30% cholesterol), that  
91 had been extruded through a membrane with a 100 nm pore diameter, were treated with DDM at  
92 a concentration predetermined to saturate - but not fully solubilize - the lipid bilayer. Purified  
93 mEnv was added, and then the detergent was removed by adsorption using polystyrene Bio-  
94 beads (Rigaud et al., 1997). The mean particle size of both naked liposomes and the mEnv-  
95 liposome mixture was ~140 nm as determined by nanoparticle tracking analysis (NTA; **Fig. 2B**).  
96 Notably, negative stain electron microscopy (EM) revealed prominent, outward protruding  
97 spikes on the liposomes, which we termed membrane-Env liposomes, or MELs (**Fig. 2C**). We  
98 probed the antigenicity of the MELs using a panel of antibodies in an ELISA. As expected, the  
99 MELs were bound efficiently by most bnAbs, while binding by non-nAbs was minimal (**Fig.**  
100 **2D**). We also probed MELs using the anti-CTT antibody, Chessie8 (Steckbeck, Sun, Sturgeon, &  
101 Montelaro, 2013), and found that it did not bind the MELs but did bind to detergent-solubilized  
102 mEnvs, which is in agreement with the EM images showing that MELs were decorated with

103 embedded spikes pointing outwards. We conclude that mEnv incorporated into the bilayer of  
104 MELs in the correct orientation with the ectodomain and MPER accessible to bnAbs and the  
105 CTT buried within the liposome.

106 The stability of MELs was analyzed over time at physiological temperature using negative stain  
107 EM and a capture ELISA. MELs appeared to retain the embedded spikes and overall appearance  
108 when visualized at 96 h by negative stain EM (**Supp. Fig. 2A**). Additionally, after 7 days at 37°C  
109 MELs were recognized efficiently by nAbs to the CD4 binding site (CD4BS), N332 glycan  
110 supersite, V3, and MPER (**Supp. Fig. 2B**), while binding by three quaternary bnAbs,  
111 PGDM1400, PGT151, and 35O22, modestly decreased. Importantly, binding by non-nAbs or  
112 anti-CTT antibody to MELs did not increase after the incubation. We surmised trimeric mEnv  
113 and MELs were likely stable enough to elicit relevant humoral responses in animals.

#### 114 **MELs elicit HIV neutralizing antibodies.**

115 Next, we explored the immunogenicity of MELs. We chose to immunize with MELs in Alum  
116 plus CpG using New Zealand White (NZW) rabbits, as we had used these adjuvants for a prior  
117 rabbit study in which sporadic tier 2 autologous nAb responses were elicited (Leaman et al.,  
118 2015). We note that although CpG ODN 1826 reportedly blocked binding of V2 bnAbs to SOSIP  
119 gp140 (Ozorowski et al., 2018), we saw no effect of CpG ODN 2007 on the reactivity of V2 or  
120 other bnAbs to mEnvs in an ELISA (**Supp. Fig. 3**). Hence, rabbits were inoculated with  
121 ADA.CM MELs every six weeks for four immunizations (**Fig. 3A**).

122 Sera from ADA.CM immunized rabbits were tested for HIV neutralizing activity in a  
123 standardized assay using TZM-bl target cells. Tier 1a strains SF162 and MW965 were  
124 neutralized with mean  $IC_{50}$ s >1:1,000, while neutralization of tier 1b strain HxB2 was modest  
125 but consistent with a mean  $IC_{50}$  of about 1:100 (**Fig. 3B** and **Supp. Fig. 4**). Sera from four of six  
126 rabbits showed autologous neutralization against ADA.CM, with rabbit serum 5393 reaching an  
127  $IC_{50}$  of >1:1,200 (**Fig. 3B** and **C**). Heterologous primary isolates were also neutralized by the  
128 sera, including the clade B isolates JRCSF (mean  $IC_{50}$  of 1:42 for six responders) and JRFL  
129 (mean  $IC_{50}$  of 1:31 for four responders), while a clade C mutant virus CH505.N197D was also  
130 neutralized (mean  $IC_{50}$  of 1:14 for four responders).

131 Encouraged by the MEL ADA.CM immunogenicity results, we chose to boost the animals using  
132 a phylogenetically distant Env, anticipating that such a strategy might broaden serum  
133 neutralizing activity if sera could already weakly neutralize the boosting mEnv. For the first  
134 boost, we chose CH505.N197D since 4 out of 6 rabbit sera showed detectable neutralization of  
135 this mEnv and a stable cell line of it had already been prepared. CH505 is a transmitted/founder  
136 (TF) virus from a donor that developed bnAbs to the CD4BS (Liao et al., 2013), and  
137 CH505.N197D is an N-glycosylation site mutant that showed increased sensitivity to CD4BS  
138 bnAbs without increased binding by non-neutralizing CD4BS antibodies b6 and F105 (**Fig. 1B**  
139 **and 7B**). Following two boosts with CH505.N197D MELs, nAb titers increased against  
140 CH505.N197D virus, albeit less so toward CH505 wild-type (WT) with an intact N197 N-  
141 glycosylation site (**Supp. Fig. 4**). Notably, rabbit 5397 neutralized CH505.N197D with an  $IC_{50}$   
142 of ~1:1,000. Meanwhile, although serum neutralization of ADA.CM decreased, neutralization  
143 against ADA and JRCSF was unchanged, and nAb titers against the heterologous isolate JRFL  
144 became more consistent (**Fig. 3B, C and Supp. Fig. 4**).

145 Because boosting with CH505.N197D improved heterologous neutralization, we chose to boost  
146 the animals once more. We had generated a mEnv cell line previously, JRFL.TD15, which  
147 incorporates “TD15” mutations shown to stabilize soluble JRFL gp140 trimers (Guenaga et al.,  
148 2015). The functional stability of JRFL.TD15 mEnv, *i.e.*, the temperature ( $T_{90}$ ) at which an Env  
149 pseudovirus loses 90% infectivity in an hour (Agrawal et al., 2011), was indeed found to be 3°C  
150 higher than JRFL.WT (**Supp. Fig. 5A**). Of note, JRFL.TD15 showed increased sensitivity to V2  
151 and V3 antibodies as compared to JRFL.WT (**Supp. Fig. 5B**). JRFL.TD15 virus was also more  
152 sensitive than JRFL.WT to 4 of 6 rabbit sera following boosting with CH505.N197D MELs  
153 (**Supp. Fig. 4**). The boost with JRFL.TD15 MELs strongly increased nAb titers against  
154 JRFL.TD15 virus in all animals, up to >1:25,000 (**Supp. Fig. 4 and 5C**). Neutralization titers  
155 against JRFL.WT were lower but had increased in 4 of 6 animals, with 50-fold and 15-fold  
156 increases in animals 5394 and 5396, respectively. Neutralization also increased against  
157 CH505.N197D with several sera, up to 1:5700 (**Supp. Fig. 4**). Heterologous neutralization -  
158 albeit sporadic and weak - increased against JRCSF, and, notably, could now be observed against  
159 the clade Bs QH0692 and 6535, and the clade C isolate Ce1086.

160 **Antibody binding specificities in MEL immune sera.**



161 MEL ADA.CM immune sera were probed in an ELISA and found to contain high antibody  
162 binding titers against trimeric ADA.CM and monomeric gp120 in ELISA, with lower titers to  
163 recombinant gp41 (**Fig. 4A**). Serum antibodies also bound to the full MPER peptide (a.a. 654-  
164 683) containing the 2F5 and 4E10/10E8 epitopes, but not to the C-terminal MPER peptide (a.a.  
165 670-683), suggesting that elicited MPER antibodies targeted mostly N-terminal epitopes in the  
166 MPER (**Supp. Fig. 6A**). Serum antibodies bound to V3 peptides of gp120 and the  
167 immunodominant Kennedy epitope region in the gp41 CTT. The latter result indicates the CTT  
168 was exposed to B cells, perhaps from disrupted MELs. Antibody titers to the FP were detectable  
169 but low, and no binding was observed to the gp41 disulfide loop that is occluded in mEnv trimer  
170 structures (Julien et al., 2013; Sanders et al., 2013; Stano et al., 2017).

171 The immune sera following boosting with CH505.N197D and JRFL.TD15 MELs showed  
172 diminished titers in ELISAs against gp41 epitopes MPER, FP, and CTT, while titers to  
173 monomeric gp120 rose about 10-fold (**Fig. 4A** and **Supp. Fig. 6A**). Of possible relevance, some  
174 N-terminal MPER, FP, and CTT residues are mismatched between ADA.CM, CH505.N197D,  
175 and JRFL.TD15 (**Supp. Fig. 6B**). Titers against V3 peptide decreased to undetectable levels  
176 from boosting with CH505.N197D, perhaps due to limited exposure of the V3 crown (**Fig. 1B**)  
177 and sequence differences in V3 between CH505.N197D and ADA.CM. V3 antibody titers  
178 rebounded following the boost with JRFL.TD15 that is modestly sensitive to V3 crown  
179 antibodies (**Supp. Fig. 6A**).

180 Immune sera from the final bleed were also tested in a competition ELISA for the ability to  
181 block bnAbs from binding to JRFL.TD15 mEnv. All six sera robustly blocked binding by  
182 VRC01 and PGT126 to the CD4BS and N332 glycan supersite, respectively. (**Fig. 4B**). Two  
183 sera, which were shown to recognize a CHR peptide (**Supp. Fig. 6**), weakly blocked binding of  
184 bnAb 3BC176 to the gp120-gp41 interface (**Fig. 4B**). Altogether, serum specificities to Env  
185 seem to be diverse, and often overlap with the CD4BS or N332 supersite, and less often with the  
186 gp41 epitopes.

#### 187 **Neutralization specificities in MEL immune sera.**

188 Next, we determined the HIV nAb specificities elicited by MEL immunization. We found the  
189 most potent neutralizing serum against ADA.CM, 5393, did not neutralize the parental isolate,  
190 ADA. Of the seven mutations that differentiate ADA.CM from ADA, we found the V1 alteration



191 (N139/I140 deletion, N142S) was sufficient to make ADA as sensitive to 5393 as ADA.CM and  
192 hence is the likely target of nAbs in this serum.

193 Removal of consensus N-linked glycosylation sites on Env (*i.e.*, glycan holes) naturally exposes  
194 the underlying protein surface and has been associated with eliciting nAbs against autologous  
195 HIV (Crooks et al., 2015; McCoy et al., 2016; Voss et al., 2017; Zhou et al., 2017). ADA.CM  
196 lacks two relatively conserved N-linked glycosylation sites at N289 and N230, so we asked  
197 whether the sera could neutralize ADA.CM mutants with N-glycosylation sites restored at these  
198 sites (K289N and D230N/K232T), as well as with other N-glycosylation site knockouts near this  
199 gp120-gp41 interface (N88A, N241S, N611D and N637K). The N-glycosylation site mutations  
200 did not affect neutralization by most sera, but the four knockout mutations did significantly  
201 increase neutralization by serum 5396, suggesting that some nAbs in this serum target the gp120-  
202 gp41 interface (**Fig. 5B**).

203 We used V3 crown and MPER linear peptides as “dump-in” reagents to see if they could block  
204 HIV serum neutralization. As anticipated, V3 peptide blocked neutralization by anti-V3 antibody  
205 F425-B4e8 and blocked most serum neutralization of the Tier 1a SF162 strain (**Fig. 6A-B**).  
206 Neutralization of heterologous tier 2 isolate Ce1086 was also abrogated by addition of V3  
207 peptide, as was neutralization of JRCSF but only in two of three animals. V3 peptide competition  
208 did not affect the potent neutralization of JRFL.WT and CH505.N197D, and only decreased  
209 neutralization of JRFL.TD15 and heterologous Tier 2 isolate QH0692 about two-fold. An MPER  
210 peptide did not block neutralization with any sera or isolate tested (data not shown).

211 To further assess the neutralization discrepancy between JRFL.TD15 and JRFL.WT, we  
212 generated R308H and WT-V2 mutants of JRFL.TD15, that revert V3 and V2, respectively, to  
213 that of JRFL.WT. On average R308H decreased the IC<sub>50</sub> of the sera 8-fold, ranging from no  
214 change (serum 5396) to a 24-fold decrease (serum 5395), so it accounted for some but not all of  
215 the difference in sensitivity between JRFL.TD15 and JRFL.WT (**Supp. Fig. 5C**).

216 JRFL.TD15.WTV2, on the other hand, decreased the neutralization of JRFL.TD15 back to  
217 JRFL.WT levels for 4 of the 6 sera, suggesting that most JRFL.TD15 nAbs that do not neutralize  
218 JRFL.WT target V2.

219 V2 nAbs have been reportedly elicited by soluble CH505 immunogens (Saunders et al., 2017).  
220 Hence, we generated an N160A mutant of CH505.N197D that knocks out neutralization by V2  
221 bnAbs (Walker et al., 2009). Removing the N160 glycosylation site did not affect serum  
222 neutralization of CH505.N197D, suggesting the elicited nAbs do not target this conserved region  
223 of V2 (**Fig. 7C**).

224 Envs CH505.N197D and JRFL.TD15 both lack N-linked glycosylation sites at position 197 near  
225 the CD4BS, so we anticipated some nAbs to these viruses may target the common glycan hole.  
226 We made use of the fact that sera from two animals, 5394 and 5396, neutralized JRFL but not the  
227 tier 2 isolate JRCSF that has the N197 glycosylation site. Domain substituted chimeras of JRFL  
228 and JRCSF were therefore tested for neutralization by these sera. Serum 5394 neutralized  
229 JRCSF.N197D and JRCSF chimeras engrafted with JRFL V2 or C2 domains that also introduced  
230 D197, while 5396 did not (**Fig. 7A**). However, an N-linked glycosylation site knock-in mutation  
231 D197N in JRFL abrogated neutralization by both sera. Of note, serum 5396 potently neutralized  
232 JRCSF N332Q, but serum 5394 did not. Overall then it seems each serum has distinct nAb  
233 specificities against the 197 glycan hole on JRFL.

234 To understand antibody specificities to the N197 glycan hole in more detail, we made N197D  
235 mutants of isolates ADA.CM, HT593, Du156, CAP210, BG505, and CNE8, in addition to  
236 mutants of CH505, JRCSF, and JRFL described above. Sera 5396 and 5397 only neutralized  
237 JRFL and CH505.N197D, respectively (**Fig. 7B**). However, serum 5394 could neutralize Du156,  
238 BG505, ADA.CM, Cap210, CH505, JRCSF, and JRFL isolates with D197, for a total of 7 out of  
239 10 N197 glycan-deleted isolates. Serum 5392 neutralized BG505.N197D ( $IC_{50}=1:500$ ) as well as  
240 CH505.N197D, thus revealing a modest breadth against N197D mutants.

241 Serum neutralization was also compared using CH505.N197D and CH505.N197S. The N197S  
242 mutant of CH505 was less sensitive than N197D to all tested sera but was more sensitive than  
243 CH505.WT (**Fig. 7C**). These data suggest some nAbs elicited to the CH505 N197 glycan hole  
244 may depend in part on the Asp side chain at position 197.

245 The V5 loop of gp120 plays a role in the epitopes of many CD4BS bnAbs (Fera et al., 2014;  
246 Schommers et al., 2020; Umotoy et al., 2019). We therefore generated V5 mutants of JRFL and  
247 CH505 to test whether serum nAbs targeting the N197D glycan hole have such features in

248 common with described CD4BS bnAbs. Replacing V5 of JRFL with that of JRCSF had little  
249 effect on neutralization by sera 5394 and 5396 (**Supp. Table 1**). Likewise, a DT insertion in V5  
250 of CH505.N197D, an insertion found in evolutionary variants of CH505 that reduces sensitivity  
251 to CD4BS bnAb CH103 (Liao et al., 2013), had a limited effect on most serum neutralization.  
252 However, the DT insertion did decrease neutralization of CH505.N197D by sera 5392 and 5397,  
253 by 2.4-fold and 5-fold, respectively, suggesting some nAbs elicited against the N197 glycan hole  
254 may also be interacting with V5.

255

## 256 **Discussion**

257 Membrane Env is the sole target of HIV nAbs and hence is a reasonable platform for a vaccine,  
258 but its development has lagged far behind that of sEnv. Here, we describe MELs, which contain  
259 purified, mEnv spikes embedded and arrayed on the membrane of liposomes. VLP vaccines have  
260 been described previously but these typically have a low copy number of mEnv (Cantin et al.,  
261 2005). High Env VLPs (hVLPs) have been developed recently that display more than 100 spikes  
262 (Stano et al., 2017), but, like most VLPs, also carry Env debris, membrane proteins from the host  
263 cell, as well as viral proteins like capsid and matrix protein, which may divert the immune  
264 response. With MELs *any* Env can in principle be embedded, as GA can be used to fix mEnvs,  
265 the majority of which fail to form well-ordered sEnv trimers. Even reasonably stable mEnvs,  
266 such as ADA.CM and CH0505, can fail to form well-ordered sEnv trimers (Leaman & Zwick,  
267 2013; Saunders et al., 2017), yet the latter were used here in MELs to elicit tier 2 nAbs.

268

269 Virosomes (Moser et al., 2007), nanodiscs (Witt et al., 2017), bicelles (Rantalainen et al., 2020),  
270 and ‘capture’ nanoparticles (Bale et al., 2017; Khairil Anuar et al., 2019; Leaman et al., 2015)  
271 are possible alternatives to MELs for displaying mEnv but either lack multivalent display or  
272 contain extraneous proteins that may divert the immune response. With MELs, T helper and B  
273 cell epitopes are exclusively from mEnv so may activate B cells efficiently *via* BCR crosslinking  
274 (Chackerian & Peabody, 2020). Size and composition of nanoparticles can affect trafficking in  
275 lymphatics as can antigen presentation and processing by dendritic cells (Brisse, Vrba, Kirk,  
276 Liang, & Ly, 2020); hence, future studies are warranted to determine whether changing MEL  
277 properties can be used to improve immune responses. Mixed MELs may also be prepared using

278 many different Envs to potentially favor activation of B cells against conserved epitopes  
279 (Kanekiyo et al., 2019).

280

281 MELs were shown to elicit autologous nAbs in most animals but heterologous neutralization was  
282 limited. However, the sequential Env regimen used was likely suboptimal. CH505.N197D has a  
283 site-specific glycan hole at position 197 near the CD4BS and is sensitive to the bnAb CH103  
284 UCA (*DPL and MBZ, ms. in preparation*). Neutralization titers to this mEnv rose rapidly on  
285 boosting and did so again on boosting with JRFL.TD15 that also lacks the N197 glycosylation  
286 site. It would be of interest to immunize rabbits and human Ig knock-in mice (Williams et al.,  
287 2017) using CH505.N197D and JRFL.TD15 in the prime and then boosting with glycan-restored  
288 Envs to see if CD4BS nAbs develop more effectively.

289 Among the MEL immune sera, antibody binding titers were low to the MPER and FP relative to  
290 the glycan deficient CD4BS or the variable loops, which are typically more immunogenic on  
291 Env (Crooks et al., 2015; Gray et al., 2011; Townsley, Li, Kozyrev, Cleveland, & Hu, 2016).  
292 However, significant sequence differences in the MPER and FP exist between the Envs we used,  
293 and weak binding titers were found to disappear on boosting. Hence, antibody responses might  
294 improve using Envs that have similar sequences in these regions, as well as high accessibility  
295 and/or affinity for bnAb UCAs (Zhang et al., 2019). Priming with epitope-specific peptides or  
296 scaffold proteins that engage bnAb UCAs, followed by MEL boosts, may also be tried.  
297 Stabilization of mEnv without chemical crosslinking and the use of specific lipids might enhance  
298 the immunogenicity of MELs as well. Finally, an MEL approach may be useful for eliciting  
299 antibodies against any membrane protein, pathogen or cancerous or diseased cells especially  
300 when membrane display influences key epitopes. Future work will focus on developing MEL  
301 vaccination in animals to more reproducibly elicit nAbs against the N197-proximal CD4BS,  
302 gp41 interface and MPER at the base of mEnv (Verkoczy et al., 2013; Xu et al., 2018).

303

## 304 **Materials and Methods**

305 **Reagents.** (i) *Cells.* TZM-bl cells were obtained from the NIH ARRRP. HEK 293T cells were  
306 purchased from the ATCC. High Env cell lines are discussed in more detail below.

307 (ii) *Antibodies*. Anti-HIV monoclonal antibodies b12, HGN194, 7B2, PGT128, PGT126,  
308 PGDM1400, VRC01, CH103, CH103 UCA, PGT151, 35O22, 10E8, F105, and 3BC176 were  
309 produced in-house as described previously (Gift, Leaman, Zhang, Kim, & Zwick, 2017). 2G12  
310 and 2F5 were purchased from Polymun. Mouse antibody Chessie 8 was a gift from George  
311 Lewis (U. Maryland).

312 (iii) *Proteins and peptides*. Monomeric JRFL gp120 was purchased from Progenics, and JRFL  
313 gp41 MBP-fusion protein M41xt (aa 535-681) was produced in *E. coli* in-house (Nelson et al.,  
314 2007). The following peptides were synthesized by Genscript: JRV3 (<sup>302</sup>NTRL<sup>SIHIGP</sup>GRAF<sup>Y</sup>  
315 TTGEIIGDI<sup>327</sup>), C34 (CH<sub>3</sub>O-<sup>628</sup>WMEWDREINNYTSLIHSLIEESQNQQEKNEQELL<sup>663</sup>-NH<sub>2</sub>),  
316 FP-bio (<sup>512</sup>AVGIGALFLGFLGAAGSTMGARS<sup>534</sup>-biotin), PID-bio (<sup>592</sup>LLGIWGC<sup>SQKLI</sup>CTTA  
317 VPW<sup>610</sup>-biotin), MPER peptides PDT-081 (<sup>654</sup>EKNEQELLELDKWASLWNWFDITNWLW  
318 YIKKK<sup>683</sup>) and 94-1 (<sup>671</sup>NWFDITNWLWYIKKKK<sup>683</sup>), and CTT peptides CTT-2  
319 (<sup>725</sup>RGPDRPEGIEEEGK<sup>737</sup>) and CTT-3 (<sup>738</sup>GERDRDRSIRL<sup>748</sup>).

320

321 **MEnv cell lines.** The cell line ADA.CM (V4) has been described previously (Stano et al., 2017).  
322 The cell line CH505.N197D was similarly prepared using the CH505 Env sequence (Liao et al.,  
323 2013), in which a mutation N197D was introduced, by lentiviral transduction followed by  
324 iterative rounds using FACS to select for a PGT145<sup>high</sup> b6<sup>low</sup> phenotype. Likewise, the stable cell  
325 line expressing JRFL.TD15 mEnv was prepared using the sEnv sequence, described elsewhere  
326 (Guenaga et al., 2015), which was connected to the remaining MPER-TM-CTT sequence of  
327 wildtype JRFL. Of note, sequencing of DNA prepared from this cell line revealed a frame shift  
328 in the CTT at nucleotide position 2134 resulting in the following altered CTT sequence and early  
329 truncation: <sup>710</sup>QGYS<sup>PCPSR</sup>PCCPPPAAPTAPRASRRRAASATATAPAAW\*<sup>749</sup>. The cell lines  
330 were prepared fresh from freezer stocks, were passaged less than 20 times in DMEM containing  
331 10% FBS, 2 mM L-glutamine, 100 U/ml penicillin, 100 µg/ml streptomycin and 2.5 µg/ml  
332 puromycin, and were kept from becoming overgrown by splitting every 3-4 d.

333

334 **Virus production.** HIV was produced as a pseudotyped virus by transient transfection of  
335 HEK293T cells using Env plasmid DNA, pSG3ΔEnv backbone plasmid and 25 kDa PEI as the  
336 transfection reagent, as previously described (Agrawal et al., 2011).

337

338 **Production and purification of mEnv.** Cell lines overexpressing mEnv were grown in shaker  
339 flasks at 37°C in 8% CO<sub>2</sub> atmosphere to a density of 4 x 10<sup>6</sup> cells/ml, then pelleted by  
340 centrifugation at 300 x g for 5 min. The cell pellet was resuspended in PBS and treated with 15  
341 mM glutaraldehyde (GA; Sigma) at room temperature for 10 min. Unreacted GA was quenched  
342 for 15 min in 50 mM Tris-HCl, after which treated cells were solubilized for 20 min in 0.5%  
343 DDM (Sigma). Cell debris was removed by centrifugation at 3000 x g for 15 min at 4°C, then the  
344 supernatant was clarified by spinning at 80,000 x g in an Optima ultracentrifuge (Beckman) for 1  
345 h at 4°C. MEnv was affinity purified using the trimer-specific bnAb PGT151 as previously  
346 described (Ringe et al., 2015; Sanders et al., 2013). Briefly, PGT151-coupled Protein A  
347 Sepharose beads (GE Healthcare) were added to the supernatant and rotated overnight at 4°C.  
348 The PGT151 beads were washed with TN75 (20 mM Tris, pH 8, 500 mM NaCl, 0.1% DDM,  
349 0.003% sodium deoxycholate) and bound mEnv was eluted in 3M MgCl<sub>2</sub>. The trimer fraction  
350 was purified by size exclusion chromatography on a Superdex 200 10/300 GL column in TBS +  
351 0.1% DDM + 0.003% sodium deoxycholate using an ÄKTA Pure 25L HPLC instrument (GE  
352 Healthcare) at a flow rate of 0.75 ml/min.

353 **Membrane Env liposome (MEL) production.** Naked liposomes were prepared by dissolving  
354 POPC and cholesterol (Avanti) in chloroform at a 70:30 molar ratio. For liposomes to be  
355 analyzed by ELISA, 18:1 Biotinyl Cap PE (Avanti) was added to the lipids at a 2% molar ratio.  
356 Lipids were dried in a vacuum overnight, hydrated in PBS (20 mg/ml total lipid) with constant  
357 shaking for 2 h at 37°C, then sonicated for 30 s. The resulting liposomes were extruded 14 times  
358 through 1 µm, 0.8 µm, 0.4 µm, 0.2 µm, and 0.1 µm filters using a mini-extrusion device (Avanti)  
359 at room temperature (RT), then diluted to 4 mg/ml in PBS. DDM was added to a final  
360 concentration of 0.1% (1.9 mM, detergent:lipid molar ratio = 0.3:1) to destabilize the lipid  
361 bilayer (Lambert, Levy, Ranck, Leblanc, & Rigaud, 1998). Purified mEnv trimers were added at  
362 a 1:10 trimer:lipid ratio (w/w, and final concentrations of 1.9 mM DDM and 7.2 µM sodium  
363 deoxycholate) and the mixture was incubated at RT for 30 min. To remove detergent,  
364 polystyrene Bio-beads SM2 (Bio-Rad), pre-washed once with methanol and five times with  
365 water, were added at 40 mg/ml and the sample was rotated at RT for 30 min. Liposomes were  
366 treated thrice more with fresh Bio-beads at 4°C for 1 h, overnight, and 2 h, respectively. MELs in  
367 the supernatant were drawn off the polystyrene beads using a pipette and stored at 4°C.

368



369 **BN-PAGE.** BN-PAGE was performed using the NativePAGE Gel System (ThermoFisher) as  
370 previously described (Leaman, Kinkead, & Zwick, 2010), except that samples were run on 3-  
371 12% gels. Coomassie staining was performed using Simply Blue Safe Stain (ThermoFisher)  
372 according to the manufacturer's instructions.

373

374 **SDS-PAGE.** Purified mEnv trimers (5  $\mu\text{g}$ ) were incubated in Laemmli Buffer (Bio-Rad)  
375 containing 50 mM dithiothreitol (DTT) for 5 min at 100°C before loading on 8-16% Tris-glycine  
376 gels (ThermoFisher). Gels were electrophoresed at RT in running buffer (25 mM Tris, 192 mM  
377 Glycine, 0.1% SDS, pH 8.3) at 150 V for 1 h, then Coomassie-stained as above.

378

379 **ELISAs.** (i) *Capture ELISA.* *Galanthus nivalis* lectin (GNL) capture ELISAs were performed as  
380 described (Leaman et al., 2015). Briefly, microtiter wells were coated with GNL (5  $\mu\text{g}/\mu\text{l}$ ) in  
381 PBS overnight at 4°C, and then purified mEnv trimers (2  $\mu\text{g}/\mu\text{l}$ ) in PBS + 0.1% DDM were  
382 captured for 2 h at 37°C. Plates were blocked with 4% non-fat dry milk (NFDM) in PBS for 1 h  
383 at 37°C. Primary and HRP-conjugated secondary antibody incubations were performed for 1 h  
384 and 45 min, respectively, in PBS + 0.05% Tween-20 + 0.4% NFDM at 37°C.

385 (ii) *Direct ELISA.* Antigens (5  $\mu\text{g}/\mu\text{l}$ ) in PBS were coated onto microtiter wells overnight at 4°C,  
386 and ELISAs were performed as above without the antigen capture step.

387 (iii) *MEL ELISA.* MEL ELISAs were performed as above, except microtiter wells were coated  
388 with streptavidin (5  $\mu\text{g}/\mu\text{l}$ ) then blocked with 4% non-fat dry milk. MELs that incorporated  
389 biotinylated DOPE were captured on wells at 37°C for 2 h. Subsequent steps were done as above,  
390 but without detergent.

391 (iv) *Competition ELISA.* A capture ELISA was performed as above except serial dilutions of sera  
392 were added to wells at twice the final concentration. After 5 min, biotinylated bnAb was added at  
393 a concentration previously determined to produce 50% maximum signal and the mixture was  
394 incubated for 1 h at 37°C. BnAb binding was detected using streptavidin-HRP (Jackson).

395

396 **Nanoparticle Tracking Analysis (NTA).** A NanoSight N300 instrument (Malvern) was used to  
397 determine the dispersity and size of liposomes and MELs following a previously described  
398 method (Stano et al., 2017).

399



400 **Negative stain EM.** Liposomes were applied for 2 min onto glow discharged, carbon-coated  
401 400-Cu mesh grids (Electron Microscopy Sciences). Excess sample was removed by gentle  
402 contact with tissue paper, and the grids were placed on a droplet of 2% phosphotungstic acid  
403 (PTA) solution (pH 6.9) for 2 min. Excess stain was removed and grids were examined on a  
404 Philips CM100 electron microscope (FEI) at 80 kV. Images were acquired using a Megaview III  
405 charge-coupled device (CCD) camera (Olympus Soft Imaging Solutions).

406

407 **Rabbit immunization.** Six New Zealand White (NZW) rabbits were immunized with a MEL  
408 formulation containing a total of 250 µg mEnv added to 100 µg CpG ODN 2007 (Invivogen) and  
409 Alum (Pierce) adjuvant, with a MEL:Alum ratio of 1:2 by volume. Injections were made  
410 bilaterally with 0.6 ml per injection *via* the subcutaneous route within 1 h of the formulation.  
411 MELs were used within 3 d of preparation. Blood was drawn from the marginal ear vein 4 d and  
412 10 d post-injection for the preparation of PBMC and serum, respectively.

413

414 **Neutralization assays.** Pseudotyped HIV-1 neutralization assays were performed using TZM-bl  
415 target cells, as previously described (Leaman et al., 2015). Briefly, TZM-bl cells were seeded  
416 onto a 96-well plate in 100 µL of growth media and incubated overnight at 37°C before the  
417 addition of virus. Virus was co-incubated with antibody or serum (previously heat-inactivated at  
418 56°C for 30 min) at 37°C for 1 h and then added to TZM-bl cells. Infectivity was determined 72  
419 h later by adding Bright-Glo (Promega) and measuring luciferase activity using a Synergy H1  
420 plate reader (BioTek).

421

## 422 **Acknowledgments**

423 We would like to thank Daniel Sands, Mark Ochoa and Trevor Biddle for technical support. We  
424 thank Jeong Hyun Lee, Jidnyasa Ingale, Shridhar Bale, and John Elder for helpful discussions on  
425 mEnv purification and MEL production. The Scripps Research Microscopy Core performed  
426 electron microscopy and Scripps Research Animal Resources carried out all animal procedures.  
427 Funding support was from the National Institutes of Health (NIAID) grants AI114401 and  
428 AI098602 (M.B.Z.), P01 AI104722 (R.T. Wyatt), as well as the James B. Pendleton Charitable  
429 Trust (M.B.Z.) to allow the purchase of an AKTA Pure instrument.

430

## 431 References

- 432 Agrawal, N., Leaman, D. P., Rowcliffe, E., Kinkead, H., Nohria, R., Akagi, J., . . . Zwick, M. B.  
433 (2011). Functional Stability of Unliganded Envelope Glycoprotein Spikes among Isolates  
434 of Human Immunodeficiency Virus Type 1 (HIV-1). *PLoS One*, 6(6), e21339.  
435 doi:10.1371/journal.pone.0021339
- 436 Bale, S., Goebrecht, G., Stano, A., Wilson, R., Ota, T., Tran, K., . . . Wyatt, R. T. (2017).  
437 Covalent linkage of HIV-1 trimers to synthetic liposomes elicits improved B cell and  
438 antibody responses. *J Virol*. doi:10.1128/jvi.00443-17
- 439 Bjorkman, P. J. (2020). Can we use structural knowledge to design a protective vaccine against  
440 HIV-1? *Hla*, 95(2), 95-103. doi:10.1111/tan.13759
- 441 Brisse, M., Vrba, S. M., Kirk, N., Liang, Y., & Ly, H. (2020). Emerging Concepts and  
442 Technologies in Vaccine Development. *Front Immunol*, 11, 583077.  
443 doi:10.3389/fimmu.2020.583077
- 444 Cantin, R., Methot, S., & Tremblay, M. J. (2005). Plunder and stowaways: incorporation of  
445 cellular proteins by enveloped viruses. *J Virol*, 79(11), 6577-6587.
- 446 Chackerian, B., & Peabody, D. S. (2020). Factors That Govern the Induction of Long-Lived  
447 Antibody Responses. *Viruses*, 12(1). doi:10.3390/v12010074
- 448 Crooks, E. T., Moore, P. L., Franti, M., Cayanan, C. S., Zhu, P., Jiang, P., . . . Binley, J. M.  
449 (2007). A comparative immunogenicity study of HIV-1 virus-like particles bearing  
450 various forms of envelope proteins, particles bearing no envelope and soluble monomeric  
451 gp120. *Virology*, 366(2), 245-262. doi:10.1016/j.virol.2007.04.033
- 452 Crooks, E. T., Tong, T., Chakrabarti, B., Narayan, K., Georgiev, I. S., Menis, S., . . . Binley, J.  
453 M. (2015). Vaccine-Elicited Tier 2 HIV-1 Neutralizing Antibodies Bind to Quaternary  
454 Epitopes Involving Glycan-Deficient Patches Proximal to the CD4 Binding Site. *PLoS*  
455 *Pathog*, 11(5), e1004932. doi:10.1371/journal.ppat.1004932
- 456 Dubrovskaya, V., Tran, K., Ozorowski, G., Guenaga, J., Wilson, R., Bale, S., . . . Wyatt, R. T.  
457 (2019). Vaccination with Glycan-Modified HIV NFL Envelope Trimer-Liposomes Elicits  
458 Broadly Neutralizing Antibodies to Multiple Sites of Vulnerability. *Immunity*, 51(5), 915-  
459 929.e917. doi:10.1016/j.immuni.2019.10.008
- 460 Fera, D., Schmidt, A. G., Haynes, B. F., Gao, F., Liao, H. X., Kepler, T. B., & Harrison, S. C.  
461 (2014). Affinity maturation in an HIV broadly neutralizing B-cell lineage through  
462 reorientation of variable domains. *Proc Natl Acad Sci U S A*, 111(28), 10275-10280.  
463 doi:10.1073/pnas.1409954111
- 464 Geertsma, E. R., Nik Mahmood, N. A., Schuurman-Wolters, G. K., & Poolman, B. (2008).  
465 Membrane reconstitution of ABC transporters and assays of translocator function. *Nat*  
466 *Protoc*, 3(2), 256-266. doi:10.1038/nprot.2007.519
- 467 Gift, S. K., Leaman, D. P., Zhang, L., Kim, A. S., & Zwick, M. B. (2017). Functional Stability of  
468 HIV-1 Envelope Trimer Affects Accessibility to Broadly Neutralizing Antibodies at Its  
469 Apex. *J Virol*, 91(24). doi:10.1128/jvi.01216-17
- 470 Gilbert, P., Wang, M., Wrin, T., Petropoulos, C., Gurwith, M., Sinangil, F., . . . Montefiori, D. C.  
471 (2010). Magnitude and breadth of a nonprotective neutralizing antibody response in an  
472 efficacy trial of a candidate HIV-1 gp120 vaccine. *J Infect Dis*, 202(4), 595-605.  
473 doi:10.1086/654816
- 474 Gray, E. S., Madiga, M. C., Hermanus, T., Moore, P. L., Wibmer, C. K., Tumba, N. L., . . .  
475 Morris, L. (2011). The neutralization breadth of HIV-1 develops incrementally over four

- 476 years and is associated with CD4+ T cell decline and high viral load during acute  
477 infection. *J Virol*, 85(10), 4828-4840. doi:10.1128/jvi.00198-11
- 478 Guenaga, J., Dubrovskaya, V., de Val, N., Sharma, S. K., Carrette, B., Ward, A. B., & Wyatt, R.  
479 T. (2015). Structure-Guided Redesign Increases the Propensity of HIV Env To Generate  
480 Highly Stable Soluble Trimers. *J Virol*, 90(6), 2806-2817. doi:10.1128/jvi.02652-15
- 481 Haynes, B. F., Burton, D. R., & Mascola, J. R. (2019). Multiple roles for HIV broadly  
482 neutralizing antibodies. *Sci Transl Med*, 11(516). doi:10.1126/scitranslmed.aaz2686
- 483 Hessell, A. J., Malherbe, D. C., Pissani, F., McBurney, S., Krebs, S. J., Gomes, M., . . .  
484 Haigwood, N. L. (2016). Achieving Potent Autologous Neutralizing Antibody Responses  
485 against Tier 2 HIV-1 Viruses by Strategic Selection of Envelope Immunogens. *J*  
486 *Immunol*, 196(7), 3064-3078. doi:10.4049/jimmunol.1500527
- 487 Hu, J. K., Crampton, J. C., Cupo, A., Ketas, T., van Gils, M. J., Slieden, K., . . . Crotty, S.  
488 (2015). Murine Antibody Responses to Cleaved Soluble HIV-1 Envelope Trimers Are  
489 Highly Restricted in Specificity. *J Virol*, 89(20), 10383-10398. doi:10.1128/jvi.01653-15
- 490 Julien, J. P., Cupo, A., Sok, D., Stanfield, R. L., Lyumkis, D., Deller, M. C., . . . Wilson, I. A.  
491 (2013). Crystal structure of a soluble cleaved HIV-1 envelope trimer. *Science*, 342(6165),  
492 1477-1483. doi:10.1126/science.1245625
- 493 Kanekiyo, M., Joyce, M. G., Gillespie, R. A., Gallagher, J. R., Andrews, S. F., Yassine, H. M., . . .  
494 . Graham, B. S. (2019). Mosaic nanoparticle display of diverse influenza virus  
495 hemagglutinins elicits broad B cell responses. *Nat Immunol*, 20(3), 362-372.  
496 doi:10.1038/s41590-018-0305-x
- 497 Khairil Anuar, I. N. A., Banerjee, A., Keeble, A. H., Carella, A., Nikov, G. I., & Howarth, M.  
498 (2019). Spy&Go purification of SpyTag-proteins using pseudo-SpyCatcher to access an  
499 oligomerization toolbox. *Nat Commun*, 10(1), 1734. doi:10.1038/s41467-019-09678-w
- 500 Kong, L., He, L., de Val, N., Vora, N., Morris, C. D., Azadnia, P., . . . Zhu, J. (2016). Uncleaved  
501 prefusion-optimized gp140 trimers derived from analysis of HIV-1 envelope  
502 metastability. *Nat Commun*, 7, 12040. doi:10.1038/ncomms12040
- 503 Krebs, S. J., Kwon, Y. D., Schramm, C. A., Law, W. H., Donofrio, G., Zhou, K. H., . . . Doria-  
504 Rose, N. A. (2019). Longitudinal Analysis Reveals Early Development of Three MPER-  
505 Directed Neutralizing Antibody Lineages from an HIV-1-Infected Individual. *Immunity*,  
506 50(3), 677-691.e613. doi:10.1016/j.immuni.2019.02.008
- 507 Lambert, O., Levy, D., Ranck, J. L., Leblanc, G., & Rigaud, J. L. (1998). A new "gel-like" phase  
508 in dodecyl maltoside-lipid mixtures: implications in solubilization and reconstitution  
509 studies. *Biophys J*, 74(2 Pt 1), 918-930. doi:10.1016/s0006-3495(98)74015-9
- 510 Leaman, D. P., Kinkead, H., & Zwick, M. B. (2010). In-solution virus capture assay helps  
511 deconstruct heterogeneous antibody recognition of human immunodeficiency virus type  
512 1. *J Virol*, 84(7), 3382-3395.
- 513 Leaman, D. P., Lee, J. H., Ward, A. B., & Zwick, M. B. (2015). Immunogenic Display of  
514 Purified Chemically Cross-Linked HIV-1 Spikes. *J Virol*, 89(13), 6725-6745.  
515 doi:10.1128/jvi.03738-14
- 516 Leaman, D. P., & Zwick, M. B. (2013). Increased functional stability and homogeneity of viral  
517 envelope spikes through directed evolution. *PLoS Pathog*, 9(2), e1003184.  
518 doi:10.1371/journal.ppat.1003184
- 519 Lee, J. H., Ozorowski, G., & Ward, A. B. (2016). Cryo-EM structure of a native, fully  
520 glycosylated, cleaved HIV-1 envelope trimer. *Science*, 351(6277), 1043-1048.  
521 doi:10.1126/science.aad2450

- 522 Liao, H. X., Lynch, R., Zhou, T., Gao, F., Alam, S. M., Boyd, S. D., . . . Haynes, B. F. (2013).  
523 Co-evolution of a broadly neutralizing HIV-1 antibody and founder virus. *Nature*,  
524 496(7446), 469-476. doi:10.1038/nature12053
- 525 Lu, M., Ma, X., Castillo-Menendez, L. R., Gorman, J., Alshafiq, N., Ermel, U., . . . Mothes, W.  
526 (2019). Associating HIV-1 envelope glycoprotein structures with states on the virus  
527 observed by smFRET. *Nature*, 568(7752), 415-419. doi:10.1038/s41586-019-1101-y
- 528 Mascola, J. R., Snyder, S. W., Weislow, O. S., Belay, S. M., Belshe, R. B., Schwartz, D. H., . . .  
529 Burke, D. S. (1996). Immunization with envelope subunit vaccine products elicits  
530 neutralizing antibodies against laboratory-adapted but not primary isolates of human  
531 immunodeficiency virus type 1. *J Infect Dis*, 173(2), 340-348.
- 532 McCoy, L. E., van Gils, M. J., Ozorowski, G., Messmer, T., Briney, B., Voss, J. E., . . . Burton,  
533 D. R. (2016). Holes in the Glycan Shield of the Native HIV Envelope Are a Target of  
534 Trimer-Elicited Neutralizing Antibodies. *Cell Rep*, 16(9), 2327-2338.  
535 doi:10.1016/j.celrep.2016.07.074
- 536 McGuire, A. T., Gray, M. D., Dosenovic, P., Gitlin, A. D., Freund, N. T., Petersen, J., . . .  
537 Stamatatos, L. (2016). Specifically modified Env immunogens activate B-cell precursors  
538 of broadly neutralizing HIV-1 antibodies in transgenic mice. *Nat Commun*, 7, 10618.  
539 doi:10.1038/ncomms10618
- 540 Morris, C. D., Azadnia, P., de Val, N., Vora, N., Honda, A., Giang, E., . . . Zhu, J. (2017).  
541 Differential Antibody Responses to Conserved HIV-1 Neutralizing Epitopes in the  
542 Context of Multivalent Scaffolds and Native-Like gp140 Trimers. *MBio*(1).  
543 doi:10.1128/mBio.00036-17
- 544 Moser, C., Amacker, M., Kammer, A. R., Rasi, S., Westerfeld, N., & Zurbriggen, R. (2007).  
545 Influenza virosomes as a combined vaccine carrier and adjuvant system for prophylactic  
546 and therapeutic immunizations. *Expert Rev Vaccines*, 6(5), 711-721.  
547 doi:10.1586/14760584.6.5.711
- 548 Nelson, J. D., Brunel, F. M., Jensen, R., Crooks, E. T., Cardoso, R. M., Wang, M., . . . Zwick, M.  
549 B. (2007). An affinity-enhanced neutralizing antibody against the membrane-proximal  
550 external region of human immunodeficiency virus type 1 gp41 recognizes an epitope  
551 between those of 2F5 and 4E10. *J Virol*, 81(8), 4033-4043.
- 552 Ozorowski, G., Cupo, A., Golabek, M., LoPiccolo, M., Ketas, T. A., Cavallary, M., . . . Moore, J.  
553 P. (2018). Effects of Adjuvants on HIV-1 Envelope Glycoprotein SOSIP Trimers In  
554 Vitro. *J Virol*, 92(13). doi:10.1128/jvi.00381-18
- 555 Pardi, N., Hogan, M. J., Porter, F. W., & Weissman, D. (2018). mRNA vaccines - a new era in  
556 vaccinology. *Nat Rev Drug Discov*, 17(4), 261-279. doi:10.1038/nrd.2017.243
- 557 Poon, B., Hsu, J. F., Gudeman, V., Chen, I. S., & Grovit-Ferbas, K. (2005). Formaldehyde-  
558 treated, heat-inactivated virions with increased human immunodeficiency virus type 1  
559 env can be used to induce high-titer neutralizing antibody responses. *J Virol*, 79(16),  
560 10210-10217. doi:10.1128/jvi.79.16.10210-10217.2005
- 561 Rantalainen, K., Berndsen, Z. T., Antanasijevic, A., Schiffner, T., Zhang, X., Lee, W. H., . . .  
562 Ward, A. B. (2020). HIV-1 Envelope and MPER Antibody Structures in Lipid  
563 Assemblies. *Cell Rep*, 31(4), 107583. doi:10.1016/j.celrep.2020.107583
- 564 Rerks-Ngarm, S., Pitisuttithum, P., Nitayaphan, S., Kaewkungwal, J., Chiu, J., Paris, R., . . .  
565 Kim, J. H. (2009). Vaccination with ALVAC and AIDSVAX to prevent HIV-1 infection  
566 in Thailand. *N Engl J Med*, 361(23), 2209-2220. doi:10.1056/NEJMoa0908492



- 567 Rigaud, J. L., Mosser, G., Lacapere, J. J., Olofsson, A., Levy, D., & Ranck, J. L. (1997). Bio-  
568 Beads: an efficient strategy for two-dimensional crystallization of membrane proteins. *J*  
569 *Struct Biol*, *118*(3), 226-235. doi:10.1006/jsbi.1997.3848
- 570 Ringe, R. P., Sanders, R. W., Yasmeen, A., Kim, H. J., Lee, J. H., Cupo, A., . . . Moore, J. P.  
571 (2013). Cleavage strongly influences whether soluble HIV-1 envelope glycoprotein  
572 trimers adopt a native-like conformation. *Proc Natl Acad Sci U S A*, *110*(45), 18256-  
573 18261. doi:10.1073/pnas.1314351110
- 574 Ringe, R. P., Yasmeen, A., Ozorowski, G., Go, E. P., Pritchard, L. K., Guttman, M., . . . Moore,  
575 J. P. (2015). Influences on the Design and Purification of Soluble, Recombinant Native-  
576 Like HIV-1 Envelope Glycoprotein Trimers. *J Virol*, *89*(23), 12189-12210.  
577 doi:10.1128/jvi.01768-15
- 578 Sanders, R. W., Derking, R., Cupo, A., Julien, J. P., Yasmeen, A., de Val, N., . . . Moore, J. P.  
579 (2013). A next-generation cleaved, soluble HIV-1 Env trimer, BG505 SOSIP.664 gp140,  
580 expresses multiple epitopes for broadly neutralizing but not non-neutralizing antibodies.  
581 *PLoS Pathog*, *9*(9), e1003618. doi:10.1371/journal.ppat.1003618
- 582 Sanders, R. W., van Gils, M. J., Derking, R., Sok, D., Ketas, T. J., Burger, J. A., . . . Moore, J. P.  
583 (2015). HIV-1 VACCINES. HIV-1 neutralizing antibodies induced by native-like  
584 envelope trimers. *Science*, *349*(6244), aac4223. doi:10.1126/science.aac4223
- 585 Sanders, R. W., Vesanen, M., Schuelke, N., Master, A., Schiffner, L., Kalyanaraman, R., . . .  
586 Moore, J. P. (2002). Stabilization of the soluble, cleaved, trimeric form of the envelope  
587 glycoprotein complex of human immunodeficiency virus type 1. *J Virol*, *76*(17), 8875-  
588 8889.
- 589 Saunders, K. O., Verkoczy, L. K., Jiang, C., Zhang, J., Parks, R., Chen, H., . . . Haynes, B. F.  
590 (2017). Vaccine Induction of Heterologous Tier 2 HIV-1 Neutralizing Antibodies in  
591 Animal Models. *Cell Rep*, *21*(13), 3681-3690. doi:10.1016/j.celrep.2017.12.028
- 592 Schiffner, T., Pallesen, J., Russell, R. A., Dodd, J., de Val, N., LaBranche, C. C., . . . Sattentau,  
593 Q. J. (2018). Structural and immunologic correlates of chemically stabilized HIV-1  
594 envelope glycoproteins. *PLoS Pathog*, *14*(5), e1006986.  
595 doi:10.1371/journal.ppat.1006986
- 596 Schommers, P., Gruell, H., Abernathy, M. E., Tran, M. K., Dingens, A. S., Gristick, H. B., . . .  
597 Klein, F. (2020). Restriction of HIV-1 Escape by a Highly Broad and Potent Neutralizing  
598 Antibody. *Cell*, *180*(3), 471-489.e422. doi:10.1016/j.cell.2020.01.010
- 599 Seddon, A. M., Curnow, P., & Booth, P. J. (2004). Membrane proteins, lipids and detergents: not  
600 just a soap opera. *Biochim Biophys Acta*, *1666*(1-2), 105-117.  
601 doi:10.1016/j.bbamem.2004.04.011
- 602 Sharma, S. K., de Val, N., Bale, S., Guenaga, J., Tran, K., Feng, Y., . . . Wyatt, R. T. (2015).  
603 Cleavage-independent HIV-1 Env trimers engineered as soluble native spike mimetics for  
604 vaccine design. *Cell Rep*, *11*(4), 539-550. doi:10.1016/j.celrep.2015.03.047
- 605 Soldemo, M., Adori, M., Stark, J. M., Feng, Y., Tran, K., Wilson, R., . . . Karlsson Hedestam, G.  
606 B. (2017). Glutaraldehyde Cross-linking of HIV-1 Env Trimers Skews the Antibody  
607 Subclass Response in Mice. *Front Immunol*, *8*, 1654. doi:10.3389/fimmu.2017.01654
- 608 Spearman, P. (2006). Current progress in the development of HIV vaccines. *Curr Pharm Des*,  
609 *12*(9), 1147-1167.
- 610 Spearman, P., Lally, M. A., Elizaga, M., Montefiori, D., Tomaras, G. D., McElrath, M. J., . . .  
611 Corey, L. J. (2011). A trimeric, V2-deleted HIV-1 envelope glycoprotein vaccine elicits

- 612 potent neutralizing antibodies but limited breadth of neutralization in human volunteers. *J*  
613 *Infect Dis*, 203(8), 1165-1173. doi:10.1093/infdis/jiq175
- 614 Stadtmueller, B. M., Bridges, M. D., Dam, K. M., Lerch, M. T., Huey-Tubman, K. E., Hubbell,  
615 W. L., & Bjorkman, P. J. (2018). DEER Spectroscopy Measurements Reveal Multiple  
616 Conformations of HIV-1 SOSIP Envelopes that Show Similarities with Envelopes on  
617 Native Virions. *Immunity*, 49(2), 235-246.e234. doi:10.1016/j.immuni.2018.06.017
- 618 Stano, A., Leaman, D. P., Kim, A. S., Zhang, L., Autin, L., Ingale, J., . . . Zwick, M. B. (2017).  
619 Dense array of spikes on HIV-1 virion particles. *J Virol*, 91(14), 415-417.  
620 doi:10.1128/jvi.00415-17
- 621 Steckbeck, J. D., Sun, C., Sturgeon, T. J., & Montelaro, R. C. (2013). Detailed topology mapping  
622 reveals substantial exposure of the "cytoplasmic" C-terminal tail (CTT) sequences in  
623 HIV-1 Env proteins at the cell surface. *PLoS One*, 8(5), e65220.  
624 doi:10.1371/journal.pone.0065220
- 625 Tomaras, G. D., & Plotkin, S. A. (2017). Complex immune correlates of protection in HIV-1  
626 vaccine efficacy trials. *Immunol Rev*, 275(1), 245-261. doi:10.1111/imr.12514
- 627 Townsley, S., Li, Y., Kozyrev, Y., Cleveland, B., & Hu, S. L. (2016). Conserved Role of an N-  
628 Linked Glycan on the Surface Antigen of Human Immunodeficiency Virus Type 1  
629 Modulating Virus Sensitivity to Broadly Neutralizing Antibodies against the Receptor  
630 and Coreceptor Binding Sites. *J Virol*, 90(2), 829-841. doi:10.1128/jvi.02321-15
- 631 Umotoy, J., Bagaya, B. S., Joyce, C., Schiffner, T., Menis, S., Saye-Francisco, K. L., . . .  
632 Landais, E. (2019). Rapid and Focused Maturation of a VRC01-Class HIV Broadly  
633 Neutralizing Antibody Lineage Involves Both Binding and Accommodation of the N276-  
634 Glycan. *Immunity*, 51(1), 141-154.e146. doi:10.1016/j.immuni.2019.06.004
- 635 UNAIDS. (2020). UNAIDS Data 2020. Retrieved from  
636 [https://www.unaids.org/sites/default/files/media\\_asset/2020\\_aids-data-book\\_en.pdf](https://www.unaids.org/sites/default/files/media_asset/2020_aids-data-book_en.pdf)
- 637 Verkoczy, L., Chen, Y., Zhang, J., Bouton-Verville, H., Newman, A., Lockwood, B., . . .  
638 Haynes, B. F. (2013). Induction of HIV-1 broad neutralizing antibodies in 2F5 knock-in  
639 mice: selection against membrane proximal external region-associated autoreactivity  
640 limits T-dependent responses. *J Immunol*, 191(5), 2538-2550.  
641 doi:10.4049/jimmunol.1300971
- 642 Voss, J. E., Andrabi, R., McCoy, L. E., de Val, N., Fuller, R. P., Messmer, T., . . . Burton, D. R.  
643 (2017). Elicitation of Neutralizing Antibodies Targeting the V2 Apex of the HIV  
644 Envelope Trimer in a Wild-Type Animal Model. *Cell Rep*, 21(1), 222-235.  
645 doi:10.1016/j.celrep.2017.09.024
- 646 Walker, L. M., Phogat, S. K., Chan-Hui, P. Y., Wagner, D., Phung, P., Goss, J. L., . . . Burton, D.  
647 R. (2009). Broad and potent neutralizing antibodies from an African donor reveal a new  
648 HIV-1 vaccine target. *Science*, 326(5950), 285-289.
- 649 Williams, W. B., Zhang, J., Jiang, C., Nicely, N. I., Fera, D., Luo, K., . . . Verkoczy, L. (2017).  
650 Initiation of HIV neutralizing B cell lineages with sequential envelope immunizations.  
651 *Nat Commun*, 8(1), 1732. doi:10.1038/s41467-017-01336-3
- 652 Witt, K. C., Castillo-Menendez, L., Ding, H., Espy, N., Zhang, S., Kappes, J. C., & Sodroski, J.  
653 (2017). Antigenic characterization of the human immunodeficiency virus (HIV-1)  
654 envelope glycoprotein precursor incorporated into nanodiscs. *PLoS One*, 12(2),  
655 e0170672. doi:10.1371/journal.pone.0170672

- 656 Xu, K., Acharya, P., Kong, R., Cheng, C., Chuang, G. Y., Liu, K., . . . Kwong, P. D. (2018).  
657 Epitope-based vaccine design yields fusion peptide-directed antibodies that neutralize  
658 diverse strains of HIV-1. *Nat Med*, 24(6), 857-867. doi:10.1038/s41591-018-0042-6
- 659 Yang, X., Wyatt, R., & Sodroski, J. (2001). Improved elicitation of neutralizing antibodies  
660 against primary human immunodeficiency viruses by soluble stabilized envelope  
661 glycoprotein trimers. *J Virol*, 75(3), 1165-1171. doi:10.1128/jvi.75.3.1165-1171.2001
- 662 Zhang, L., Irimia, A., He, L., Landais, E., Rantalainen, K., Leaman, D. P., . . . Zwick, M. B.  
663 (2019). An MPER antibody neutralizes HIV-1 using germline features shared among  
664 donors. *Nat Commun*, 10(1), 5389. doi:10.1038/s41467-019-12973-1
- 665 Zhou, T., Doria-Rose, N. A., Cheng, C., Stewart-Jones, G. B. E., Chuang, G. Y., Chambers, M., .  
666 . . Kwong, P. D. (2017). Quantification of the Impact of the HIV-1-Glycan Shield on  
667 Antibody Elicitation. *Cell Rep*, 19(4), 719-732. doi:10.1016/j.celrep.2017.04.013
- 668



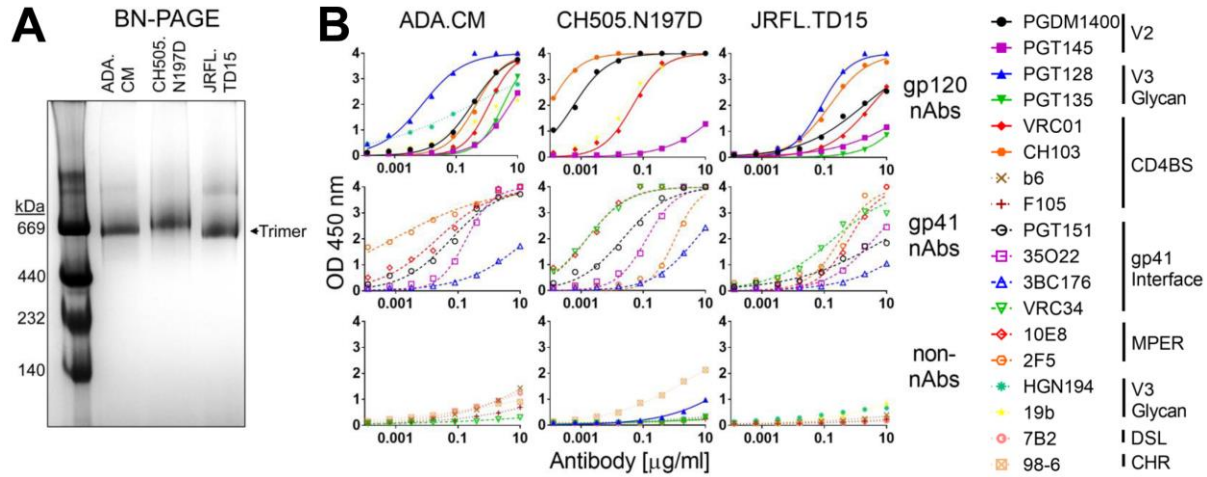

669 **Figure 1. Purified mEnvs are trimeric and display native antigenicity.** (A) MEnv (5 µg) was  
 670 analyzed using BN-PAGE stained with Coomassie blue. (B) Purified mEnv was captured using  
 671 lectin from *Galanthus nivalis* (GNL) and probed in an ELISA using a panel of antibodies.  
 672 Antibodies are classified as nAbs if they neutralize cognate virus with an  $IC_{50} < 50$  µg/ml.

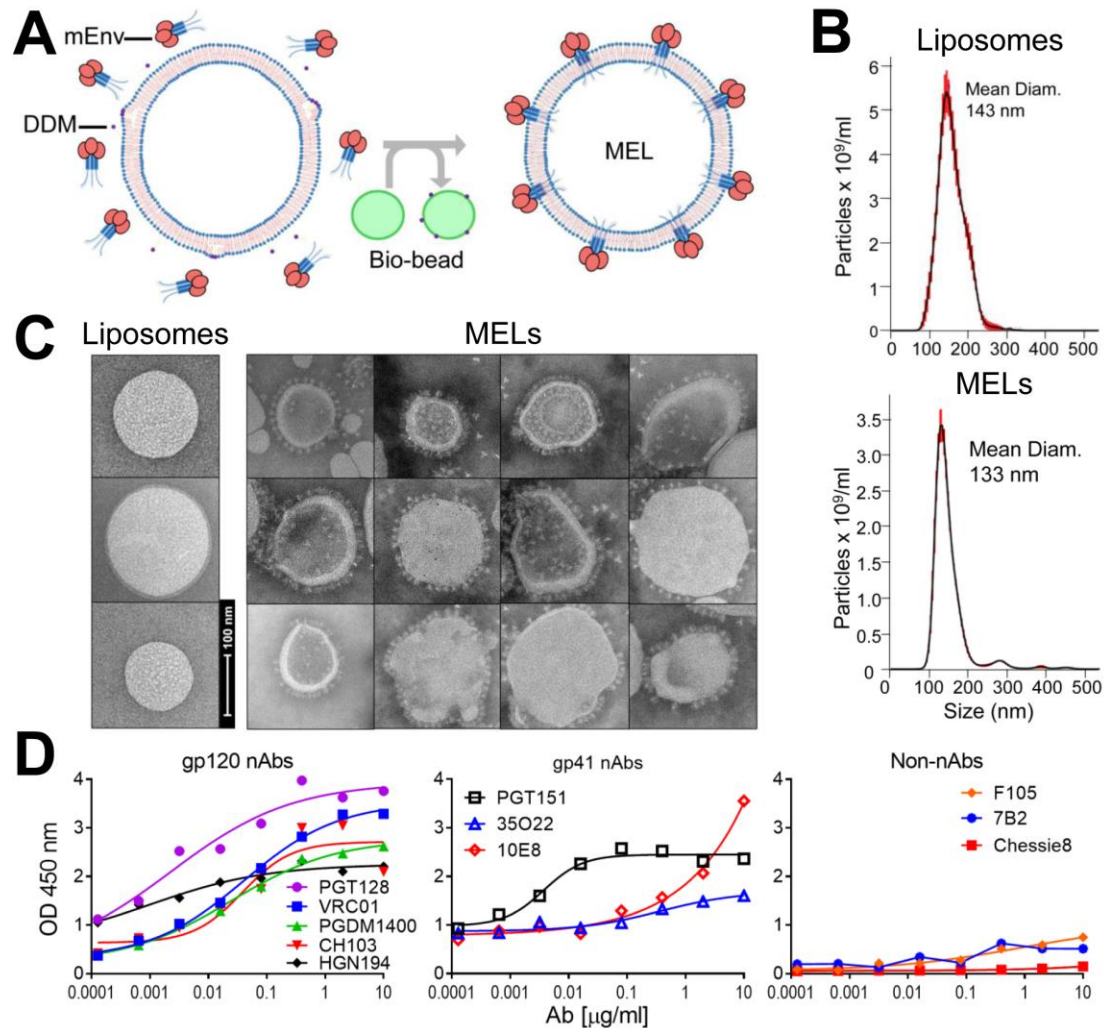

673 **Figure 2. Production, properties and antigenicity of mEnv liposomes (MELs).** (A) Naked  
 674 liposomes were treated with mild detergent DDM that destabilizes the membrane bilayer and  
 675 then combined with purified mEnv trimers (left). Detergent was depleted from the liposome-  
 676 mEnv mixture by repeated incubations with bio-beads, which yields MELs decorated with an  
 677 array of spikes (right). (B) Nanoparticle tracking analysis (NTA) reveals liposomes are  
 678 monodispersed with a mean diameter of 143 nm; MELs with mEnv remain monodispersed with  
 679 a mean diameter of 133 nm. (C) Negative stain EM shows MELs embedded with mEnv trimeric  
 680 spikes. (D) ELISA data shows bnAbs bind to MELs but non-nAbs and anti-CTT antibody,  
 681 Chessie8, do not. MELs were labeled with biotin-DOPE and captured on streptavidin coated  
 682 microwells.

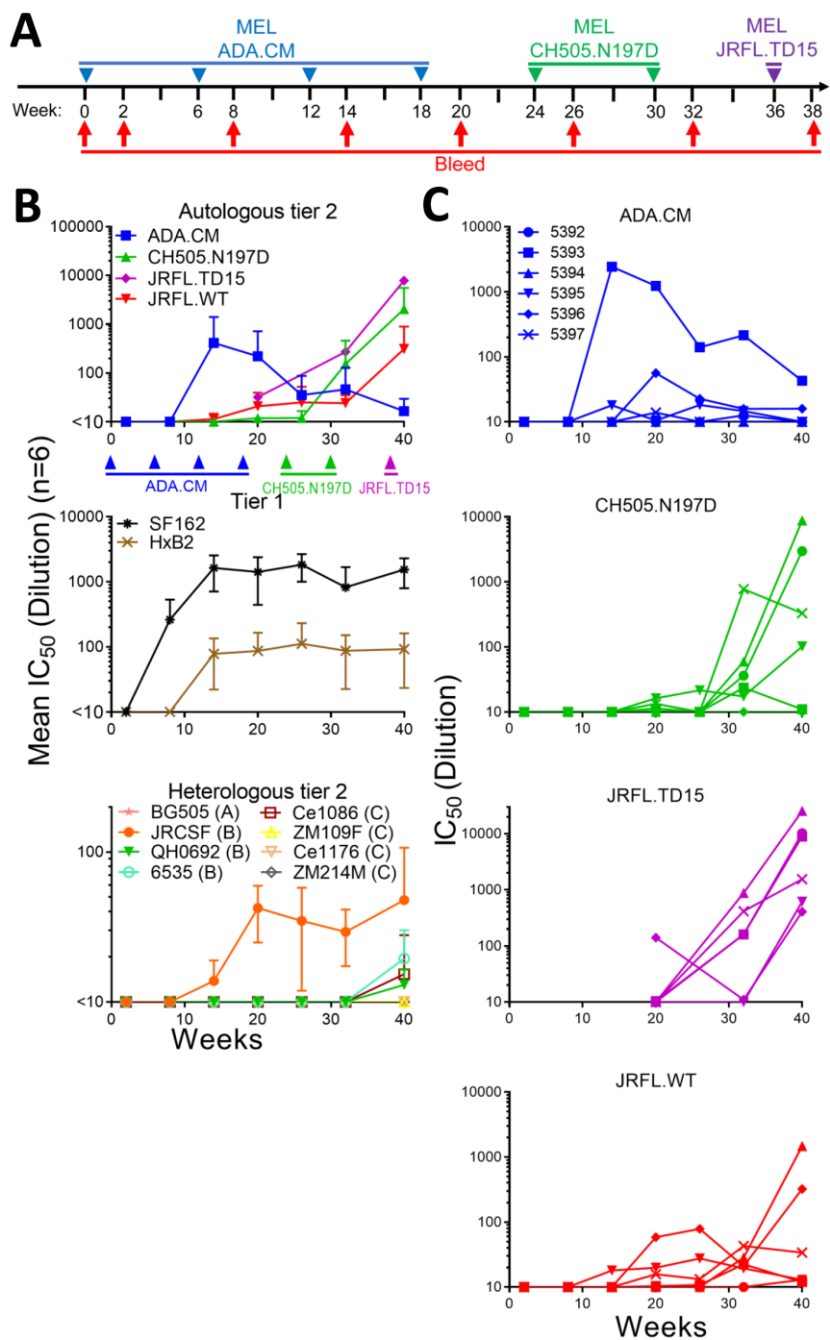

683

684 **Figure 3. Immunization with MELs in rabbits elicited HIV nAbs.** (A) Schedule of  
 685 immunization of NZW rabbits with MELs. Rabbits were immunized with MELs seven times,  
 686 *i.e.*, ADA.CM (4 times), CH505.N197D (2 times), and JRFL.TD15 (1 time), six weeks apart. (B)  
 687 Kinetics of neutralization of autologous and heterologous tier 1 and tier 2 isolates by MEL  
 688 immune sera. Mean IC<sub>50</sub>s of six rabbit sera from each bleed against the three immunizing or  
 689 autologous isolates and JRFL.WT (top), heterologous tier 1 isolates (middle), and a panel of  
 690 heterologous tier 2 isolates (bottom). (C) Kinetics of neutralization of immunizing virus strains  
 691 by individual rabbit sera.

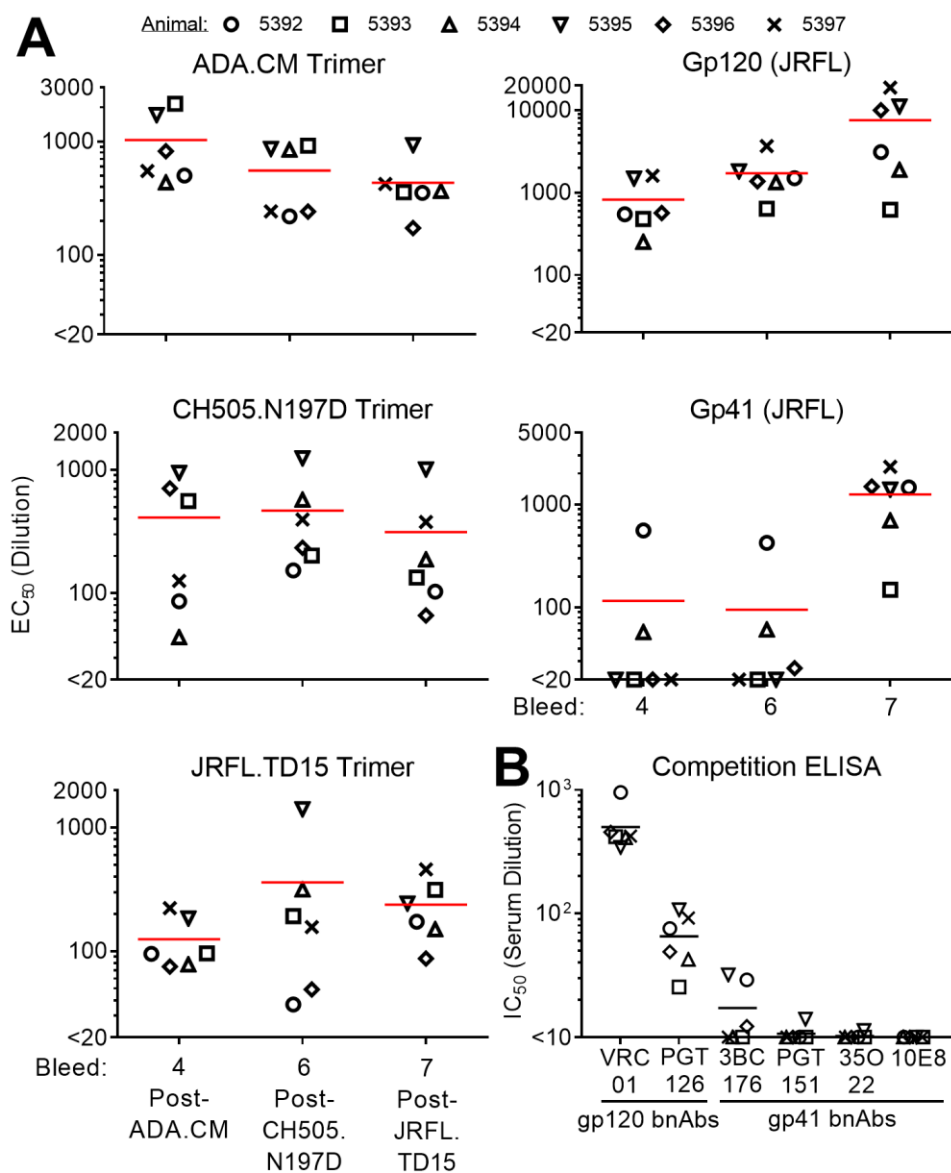

692 **Figure 4. Antibody binding specificities in MEL antisera revealed by ELISA.** (A) Sera from  
 693 bleeds 4 (post-ADA.CM), 6 (post-CH505.N197D), and 7 (post-JRFL.TD15) were tested for  
 694 binding to each of the three immunizing mEnvs, as well as recombinant gp120 (JRCSF) and  
 695 gp41 (JRFL). (B) Sera from the final bleed were tested for the ability to block biotinylated bnAb  
 696 binding to JRFL.TD15 trimer. The biotinylated bnAbs include those against the CD4BS  
 697 (VRC01), N332 glycan supersite (PGT126), gp120-gp41 interface (3BC176, PGT151, and  
 698 35O22) and the MPER (10E8).

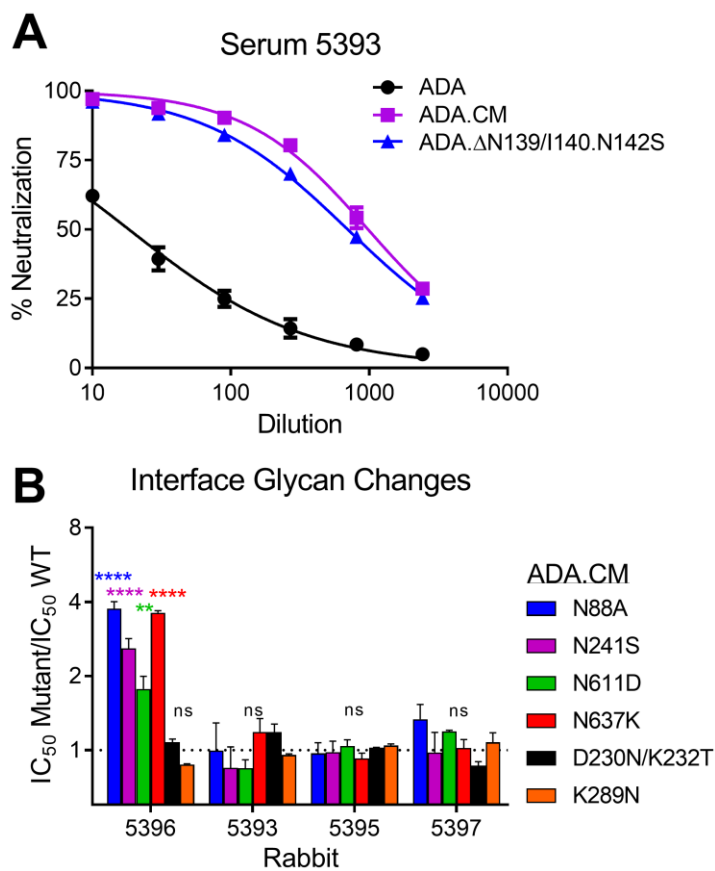

699 **Figure 5. ADA.CM neutralization activities in sera 5393 and 5396 target V1 and the gp120-**  
700 **gp41 interface.** (A) Serum 5393 from Bleed 3, following immunization with ADA.CM, was  
701 tested for neutralization of ADA.CM, parental ADA, and an ADA mutant containing a  
702 N139/I140 deletion and N142S substitution in V1 of gp120. (B) Four rabbit sera from Bleed 4  
703 that neutralized ADA.CM with an  $IC_{50} > 10$  were tested in neutralization assays against  
704 ADA.CM with glycan knockout mutations (N88A, N241S, N611D and N637K) or glycan hole  
705 filling mutations (D230N/K232T and K289N) near the gp120-gp41 interface.

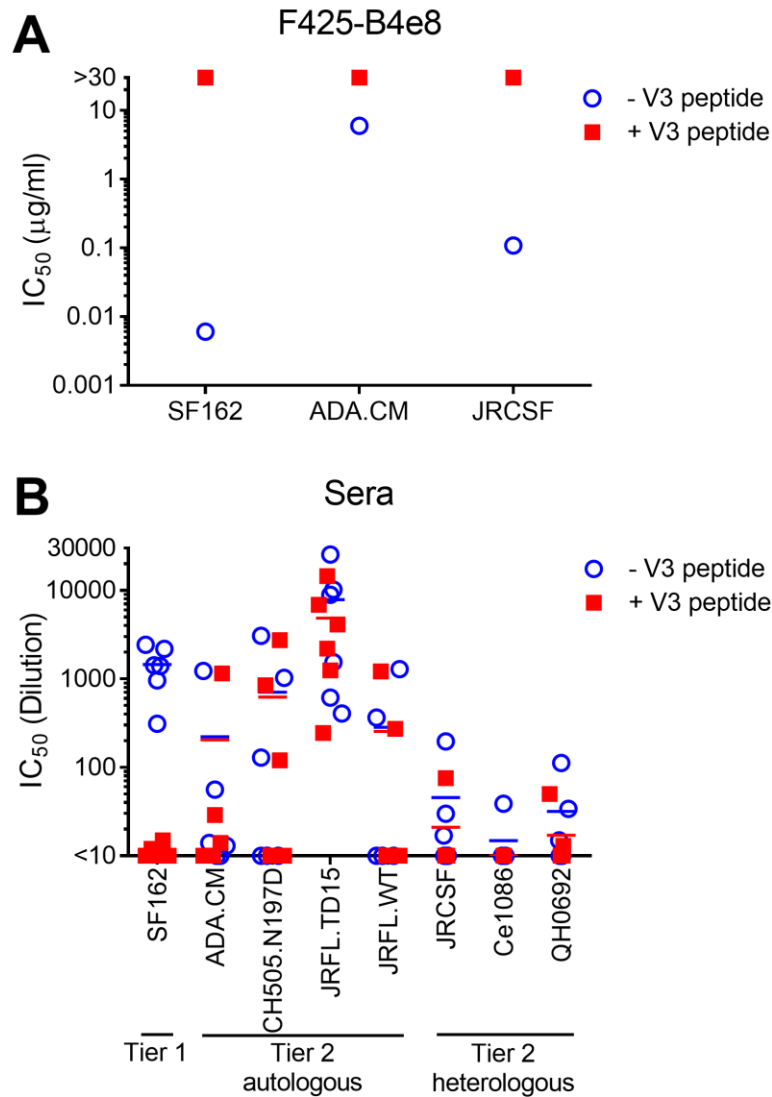

706

707 **Figure 6. Serum neutralization of autologous isolates and some heterologous Tier 2 isolates**  
708 **cannot be blocked by V3 peptide.** Neutralization by (A) monoclonal antibody F425-B4e8 that  
709 binds to the V3 crown, and (B) sera from the final bleed, was tested in a neutralization assay  
710 against HIV isolates in the presence or absence of V3 peptide (JRFL sequence:  
711 NTRLSTHIGPGRAFYTGTGEIIGDI).

**A**

| Env   | Chimera         |      |      |   |    |    |      |    |    |    |    | IC50 (Dilution) |      |
|-------|-----------------|------|------|---|----|----|------|----|----|----|----|-----------------|------|
|       |                 | N197 |      |   |    |    | N332 |    |    |    |    | 5394            | 5396 |
| JRFL  | WT              | C1   | V1V2 | X | C2 | V3 | C3   | V4 | C4 | V5 | C5 | 1433            | 234  |
| JRCSF | WT              | C1   | V1V2 |   | C2 | V3 | C3   | V4 | C4 | V5 | C5 | <10             | 13   |
| JRCSF | C2 FL (long)    | C1   | V1V2 | X | C2 | V3 | C3   | V4 | C4 | V5 | C5 | 451             | <10  |
| JRCSF | C2 FL (short)   | C1   | V1V2 |   | C2 | V3 | C3   | V4 | C4 | V5 | C5 | <10             | <10  |
| JRCSF | V1V2 FL (long)  | C1   | V1V2 | X | C2 | V3 | C3   | V4 | C4 | V5 | C5 | 372             | 11   |
| JRCSF | V1V2 FL (short) | C1   | V1V2 |   | C2 | V3 | C3   | V4 | C4 | V5 | C5 | <10             | <10  |
| JRCSF | N197D           | C1   | V1V2 | X | C2 | V3 | C3   | V4 | C4 | V5 | C5 | 456             | <10  |
| JRCSF | N332Q           | C1   | V1V2 |   | C2 | V3 | X    | C3 | V4 | C4 | V5 | <10             | 1337 |
| JRFL  | D197N           | C1   | V1V2 |   | C2 | V3 | C3   | V4 | C4 | V5 | C5 | <10             | <10  |
| JRFL  | D197N/S199A     | C1   | V1V2 | X | C2 | V3 | C3   | V4 | C4 | V5 | C5 | 879             | 288  |

IC50: <10 (yellow), 10-30 (orange), 31-300 (red), >300 (dark red)

**B**

| HIV Isolate |      | Vaccine Sera |      |      |      |      | Monoclonal Antibodies |               |       |          |         |         |             |
|-------------|------|--------------|------|------|------|------|-----------------------|---------------|-------|----------|---------|---------|-------------|
|             |      | 5392         | 5393 | 5394 | 5395 | 5396 | 5397                  | Non-nAb CD4BS |       | V3 Crown |         | CD4BS   | N332 Glycan |
| JRFL.WT     | N197 | nd           | nd   | <10  | 61   | <10  | <10                   | 6.8           | 0.90  | nd       | 0.005   | nd      | 0.27        |
|             | D197 | 13           | 12   | 1433 | 144  | 234  | 35                    | 6.4           | 1.5   | nd       | 0.019   | nd      | 0.16        |
| JRCSF       | N197 | 22           | 13   | <10  | 134  | 13   | 17                    | 46.4          | 0.52  | nd       | 0.029   | nd      | 0.20        |
|             | D197 | nd           | nd   | 456  | 108  | <10  | <10                   | 3.4           | 0.037 | nd       | 0.006   | nd      | 0.20        |
| ADA.CM      | N197 | <10          | 48   | <10  | 79   | 70   | <10                   | >50           | 6.1   | >50      | 0.076   | 0.00089 | 2.2         |
|             | D197 | 23           | 93   | 488  | 157  | 113  | <10                   | >50           | 0.31  | 11.8     | 0.00091 | 0.00025 | 0.25        |
| HT593       | N197 | <10          | 10   | <10  | 65   | <10  | <10                   | 20.5          | 4.7   | >50      | 0.21    | >5      | 0.41        |
|             | D197 | <10          | <10  | <10  | 43   | <10  | <10                   | >50           | >50   | >50      | 0.0068  | >5      | 0.96        |
| CH505       | N197 | 15           | 12   | 15   | 23   | <10  | 11                    | >50           | >50   | >50      | nd      | nd      | nd          |
|             | D197 | 2971         | 11   | 8852 | 102  | <10  | 330                   | >50           | >50   | >50      | nd      | nd      | nd          |
| C Du156     | N197 | <10          | <10  | <10  | 30   | <10  | <10                   | >50           | >50   | >50      | 0.040   | 0.030   | 0.060       |
|             | D197 | <10          | 11   | 124  | 67   | <10  | <10                   | >50           | >50   | >50      | 0.0018  | 0.058   | 0.080       |
| Cap210      | N197 | <10          | 19   | <10  | 104  | <10  | <10                   | >50           | >50   | >50      | >5      | >5      | 0.87        |
|             | D197 | 61           | 49   | 44   | 461  | 35   | 88                    | >50           | 18.5  | 14.5     | >5      | >5      | 0.033       |
| A BG505     | N197 | <10          | <10  | <10  | <10  | <10  | <10                   | >50           | >50   | >50      | 0.0034  | 0.22    | 0.97        |
|             | D197 | 508          | <10  | 435  | <10  | <10  | <10                   | >50           | >50   | >50      | 0.00013 | >5      | 0.07        |
| AE CNE8     | N197 | <10          | <10  | <10  | 54   | <10  | <10                   | >50           | >50   | >50      | 0.26    | 0.0014  | 0.76        |
|             | D197 | <10          | <10  | <10  | 30   | <10  | <10                   | >50           | >50   | >50      | 0.00021 | 0.0023  | 0.23        |

Sera IC50 (Dilution): <10 (yellow), 10-30 (orange), 31-300 (red), >300 (dark red)  
mAb IC50 (µg/ml): >50 (yellow), 50-1 (orange), 1-0.01 (red), <0.01 (dark red)

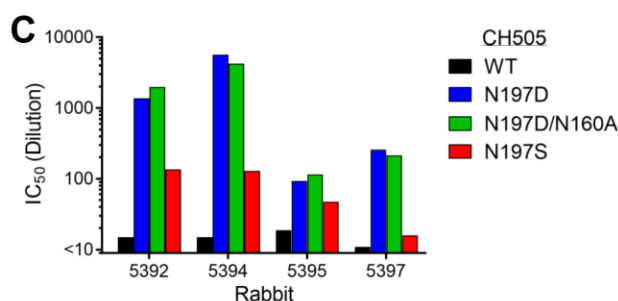

712

713 **Figure 7. MELs elicited potent nAbs to a glycan hole at position 197.** (A) Neutralization by  
714 sera 5394 and 5396 against a panel of domain swapped HIV Env chimeras between JRFL and  
715 the more resistant JRCSF, as well as against N-glycosylation site mutants N197 and N332 of  
716 JRCSF. (B) N197D mutants of diverse HIV isolates were tested for neutralization by sera from  
717 the final bleed post-sequential MEL immunization (left) as well as by a panel of bnAbs and non-  
718 nAbs (right). JRFL and JRCSF and their N197 mutants were tested for neutralization by V3  
719 antibody F425-B4e8 and MPER antibody 2F5 rather than 447-52D and 4E10, respectively. (C)  
720 Rabbit sera from the final bleed were tested for neutralization against CH505.WT,  
721 CH505.N197D, CH505.N197D.N160A that knocks out V2 bnAb neutralization, and  
722 CH505.N197S.



723 **Supplemental Table 1.** Effect of V5 substitutions on serum neutralization.

| Serum | IC <sub>50</sub> (Dilution) |                    | Fold Decrease (WT/Mutant) |     |
|-------|-----------------------------|--------------------|---------------------------|-----|
|       | CH505.N197D                 | CH505.N197D.V5-DT* |                           |     |
| 5392  | 1424                        | 600                | 2.4                       |     |
| 5394  | 4002                        | 2467               | 1.6                       |     |
| 5395  | 46                          | 52                 | 0.9                       |     |
| 5397  | 138                         | 27                 | 5.1                       |     |
|       |                             | JRFL               | JRFL.V5-CSF <sup>†</sup>  |     |
| 5394  |                             | 803                | 542                       | 1.5 |
| 5396  |                             | 180                | 385                       | 0.5 |

724 \* Contains a DT insertion in the V5 domain of gp120.

725 <sup>†</sup> JRFL V5 domain has been replaced with the V5 domain of JRCSF.

726 **Supplemental Figure 1.**

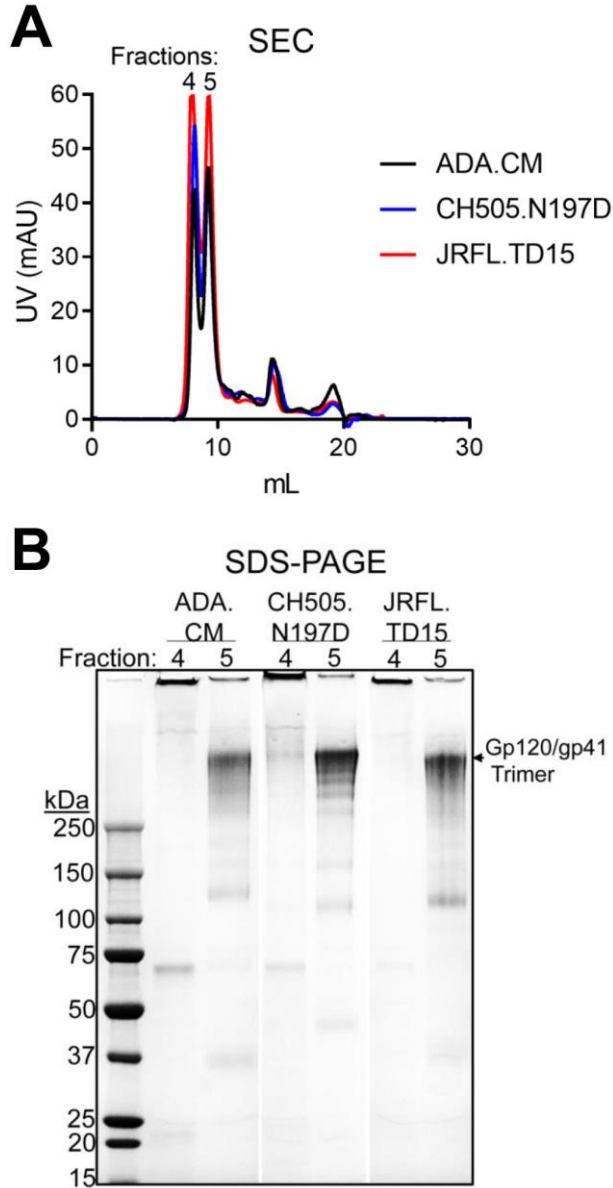

727

728 **Supp. Figure 1. Separation of mEnv trimers from non-trimeric Env.** (A) mEnv, GA  
729 crosslinked and PGT151 affinity-purified, was analyzed using size exclusion chromatography  
730 (SEC). (B) Two mEnv containing fractions from SEC were analyzed by denaturing Coomassie  
731 SDS-PAGE.

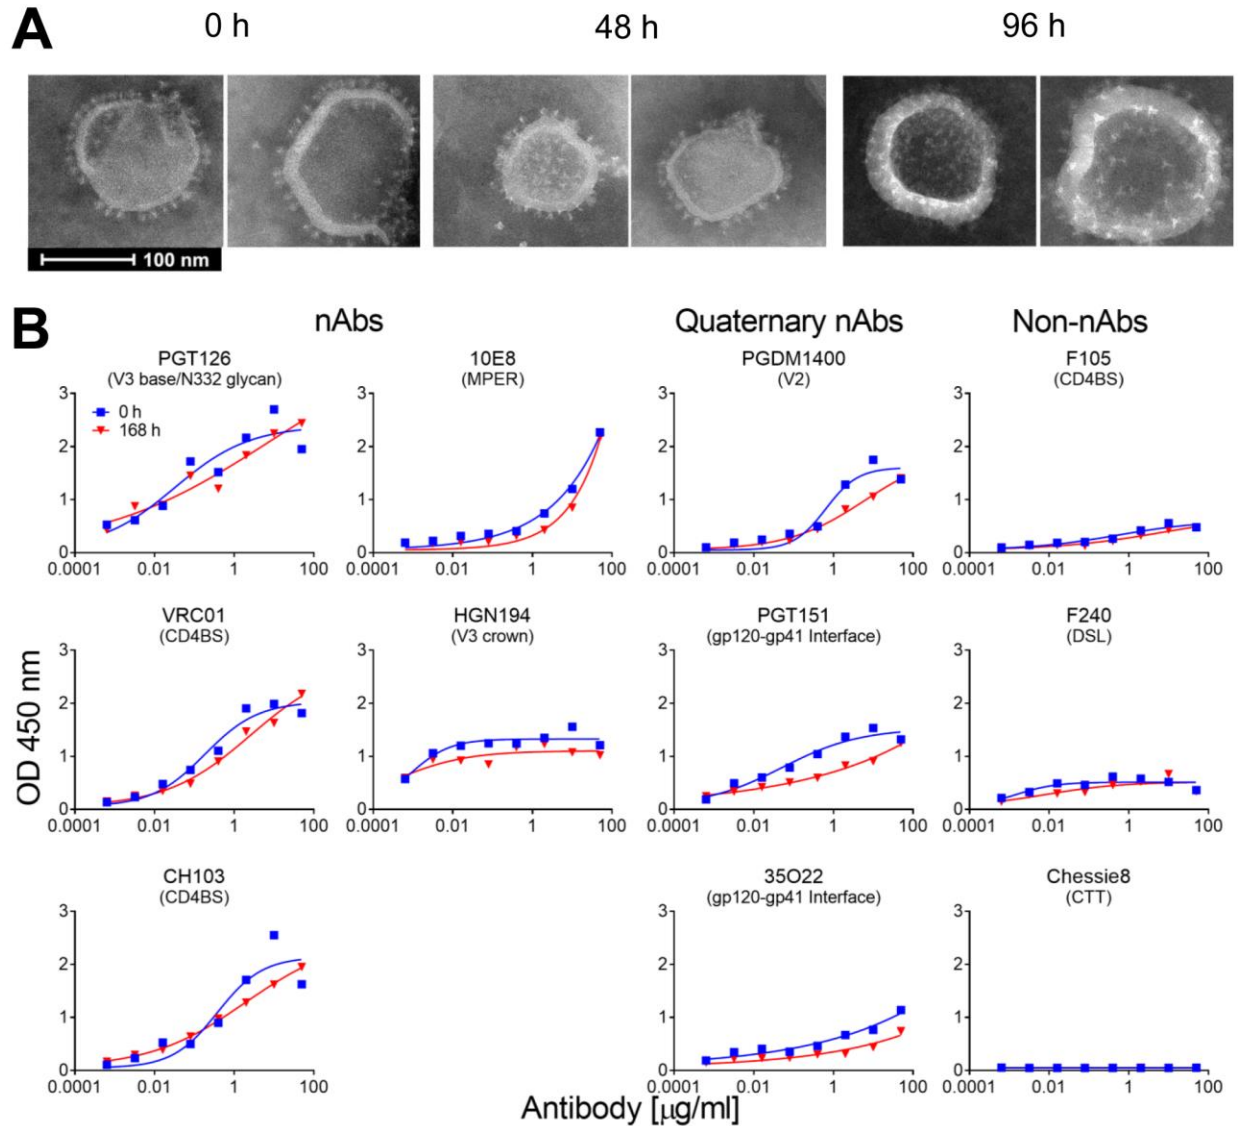

732

733 **Supp. Figure 2. Stability of MELs in solution.** (A) Negative stain EM images of MELs  
 734 following 0, 48 and 96 h incubation periods at 37°C. (B) Antibody binding properties of MELs  
 735 before and after incubation for 168 h at 37°C, as analyzed by streptavidin-capture ELISA as in  
 736 Figure 2D.

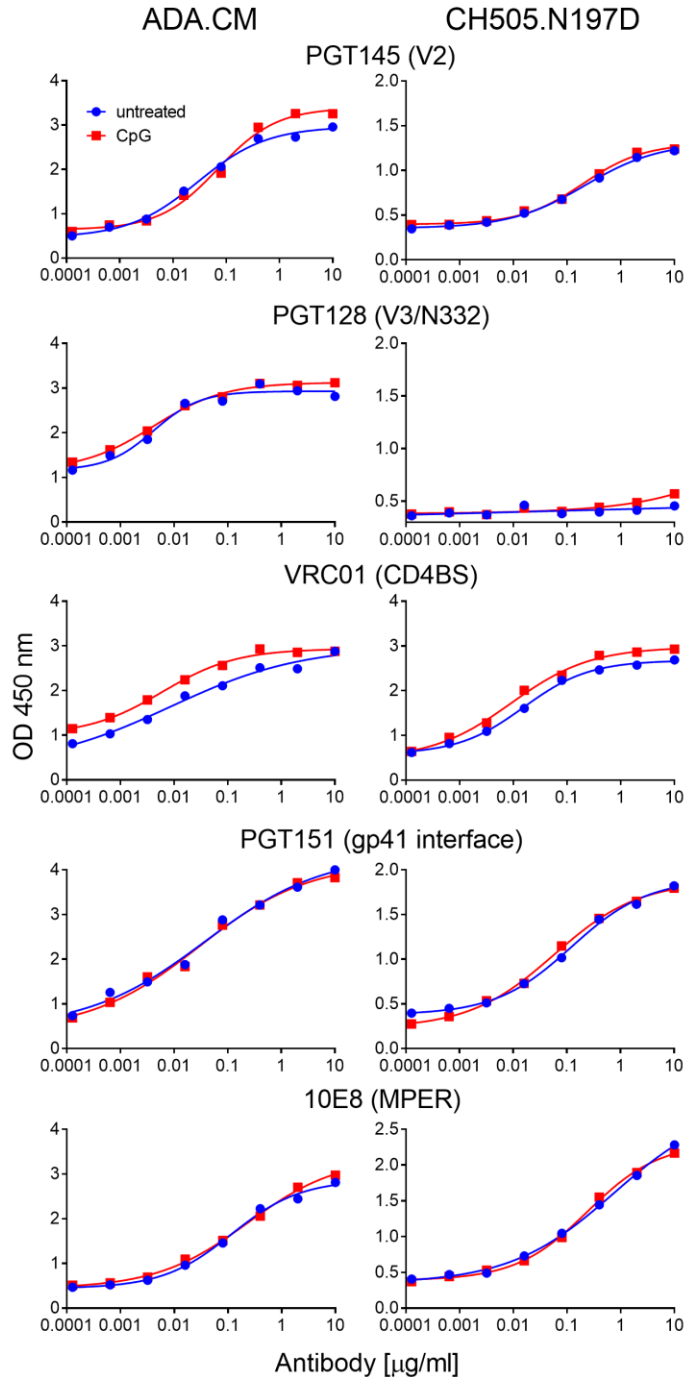

737 **Supp. Figure 3. CpG ODN 2007 adjuvant does not occlude major bnAb epitopes.** Antibody  
738 binding to immobilized ADA.CM and CH505.N197D trimers was determined by ELISA in the  
739 presence or absence of 15  $\mu\text{g/ml}$  CpG ODN 2007.

|                   | Isolate             | Clade    | Bleed | IC50  |      |       |       |       |       |    |
|-------------------|---------------------|----------|-------|-------|------|-------|-------|-------|-------|----|
|                   |                     |          |       | 5392  | 5393 | 5394  | 5395  | 5396  | 5397  |    |
| Tier 1            | SF162               | B        | 4     | 425   | 134  | 1409  | >2430 | 1685  | >2430 |    |
|                   |                     |          | 6     | 304   | 103  | 308   | 885   | 929   | >2430 |    |
|                   |                     |          | 7     | 1104  | 351  | 1412  | 2014  | 1971  | >2430 |    |
|                   | MN                  | B        | 4     | nd    | nd   | nd    | nd    | nd    | nd    |    |
|                   |                     |          | 6     | nd    | nd   | nd    | nd    | nd    | nd    |    |
|                   |                     |          | 7     | 838   | 538  | 1915  | 1038  | 1317  | >2430 |    |
|                   | MW965               | C        | 4     | 1997  | 1045 | 2002  | 1203  | >2430 | 869   |    |
|                   |                     |          | 6     | nd    | nd   | nd    | nd    | nd    | nd    |    |
|                   |                     |          | 7     | nd    | nd   | nd    | nd    | nd    | nd    |    |
|                   | HxB2                | B        | 4     | 22    | 59   | 240   | 86    | 46    | 70    |    |
|                   |                     |          | 6     | 39    | 135  | 192   | 68    | 18    | 71    |    |
|                   |                     |          | 7     | 61    | 81   | 219   | 139   | 22    | 57    |    |
| Tier 2 Autologous | ADA.CM              | B        | 4     | <10   | 1232 | <10   | 11    | 56    | 14    |    |
|                   |                     |          | 6     | 13    | 214  | <10   | 15    | 16    | <10   |    |
|                   |                     |          | 7     | <10   | 43   | <10   | 28    | 16    | <10   |    |
|                   | CH505.N197D*        | C        | 4     | 10    | 11   | <10   | 16    | <10   | 13    |    |
|                   |                     |          | 6     | 36    | 24   | 60    | 17    | <10   | 774   |    |
|                   |                     |          | 7     | 1380  | 11   | 5704  | 126   | <10   | 330   |    |
|                   | JRFL.TD15†          | B        | 4     | <10   | <10  | <10   | <10   | 141   | <10   |    |
|                   |                     |          | 6     | 161   | 161  | 879   | <10   | 11    | 416   |    |
|                   |                     |          | 7     | 10205 | 8951 | 25446 | 614   | 408   | 1548  |    |
|                   | Tier 2 Heterologous | JRFL.WT† | B     | 4     | <10  | 10    | <10   | 20    | 59    | 16 |
|                   |                     |          |       | 6     | <10  | 22    | 28    | 19    | 21    | 43 |
|                   |                     |          |       | 7     | 13   | 12    | 1475  | 37    | 323   | 34 |
| JRCSF             |                     | B        | 4     | 46    | 24   | 23    | 61    | 38    | 62    |    |
|                   |                     |          | 6     | 32    | 25   | 18    | 31    | 19    | 51    |    |
|                   |                     |          | 7     | 22    | 13   | <10   | 99    | 10    | 18    |    |
| ADA               |                     | B        | 4     | <10   | 17   | <10   | 31    | 19    | 16    |    |
|                   |                     |          | 6     | 33    | 32   | 20    | 20    | 16    | 23    |    |
|                   |                     |          | 7     | 15    | 21   | <10   | 90    | 16    | <10   |    |
| QH0692            |                     | B        | 4     | <10   | <10  | <10   | <10   | <10   | <10   |    |
|                   |                     |          | 6     | <10   | <10  | <10   | <10   | <10   | <10   |    |
|                   |                     |          | 7     | 34    | <10  | <10   | 112   | <10   | 15    |    |
| 6535              |                     | B        | 4     | <10   | <10  | <10   | <10   | <10   | <10   |    |
|                   |                     |          | 6     | <10   | <10  | <10   | <10   | <10   | <10   |    |
|                   |                     |          | 7     | <10   | <10  | <10   | 51    | <10   | 12    |    |
| CH505.WT*         |                     | C        | 4     | <10   | <10  | <10   | 12    | <10   | 11    |    |
|                   |                     |          | 6     | 21    | 31   | 16    | 16    | <10   | 14    |    |
|                   |                     |          | 7     | 15    | 12   | 15    | 47    | <10   | 11    |    |
| Ce1086            |                     | C        | 4     | <10   | <10  | <10   | <10   | <10   | <10   |    |
|                   |                     |          | 6     | <10   | <10  | <10   | <10   | <10   | <10   |    |
|                   |                     |          | 7     | 11    | <10  | <10   | 11    | <10   | 41    |    |
| ZM109F            |                     | C        | 4     | <10   | <10  | <10   | <10   | <10   | <10   |    |
|                   |                     |          | 6     | <10   | <10  | <10   | <10   | <10   | <10   |    |
|                   |                     |          | 7     | <10   | <10  | <10   | 29    | <10   | <10   |    |
| Ce1176            | C                   | 4        | <10   | <10   | <10  | <10   | <10   | <10   |       |    |
|                   |                     | 6        | <10   | <10   | <10  | <10   | <10   | <10   |       |    |
|                   |                     | 7        | <10   | <10   | <10  | 26    | <10   | <10   |       |    |
| ZM214M            | C                   | 4        | <10   | <10   | <10  | <10   | <10   | <10   |       |    |
|                   |                     | 6        | <10   | <10   | <10  | <10   | <10   | <10   |       |    |
|                   |                     | 7        | <10   | <10   | <10  | 21    | <10   | <10   |       |    |
| BG505             | A                   | 4        | <10   | <10   | <10  | 10    | <10   | <10   |       |    |
|                   |                     | 6        | <10   | 13    | <10  | <10   | <10   | <10   |       |    |
|                   |                     | 7        | <10   | <10   | <10  | 15    | <10   | <10   |       |    |
| Non-HIV-1         | SIVmac239           | SIV      | 4     | <10   | <10  | <10   | <10   | <10   | <10   |    |
|                   |                     |          | 6     | <10   | <10  | <10   | <10   | <10   | <10   |    |
|                   |                     |          | 7     | <10   | <10  | <10   | 24    | <10   | <10   |    |
|                   | HIV-2 WT            | HIV-2    | 4     | <10   | <10  | <10   | <10   | <10   | <10   |    |
|                   |                     |          | 6     | <10   | <10  | <10   | <10   | <10   | <10   |    |
|                   |                     |          | 7     | <10   | <10  | <10   | 10    | <10   | <10   |    |
|                   | HIV-2 C1            | HIV-2    | 4     | <10   | <10  | <10   | <10   | <10   | <10   |    |
|                   |                     |          | 6     | <10   | <10  | <10   | <10   | <10   | <10   |    |
|                   |                     |          | 7     | <10   | <10  | <10   | 10    | <10   | <10   |    |

nd: not determined IC50: <10 10-30 31-300 >300  
 \* Variants of HIV-1 CH505.  
 † Variants of HIV-1 JRFL.

740

741 **Supp. Figure 4. HIV neutralization breadth and potency of MEL immunized rabbit sera.**  
 742 Sera taken from rabbits were tested in neutralization assays against a cross-clade panel of  
 743 autologous and heterologous HIV isolates. Data shown are reciprocal serum dilution at the IC<sub>50</sub>  
 744 from bleeds 4 (post ADA.CM), 6 (post CH505.N197D) and 7 (post JRFL.TD15) for each isolate.

745

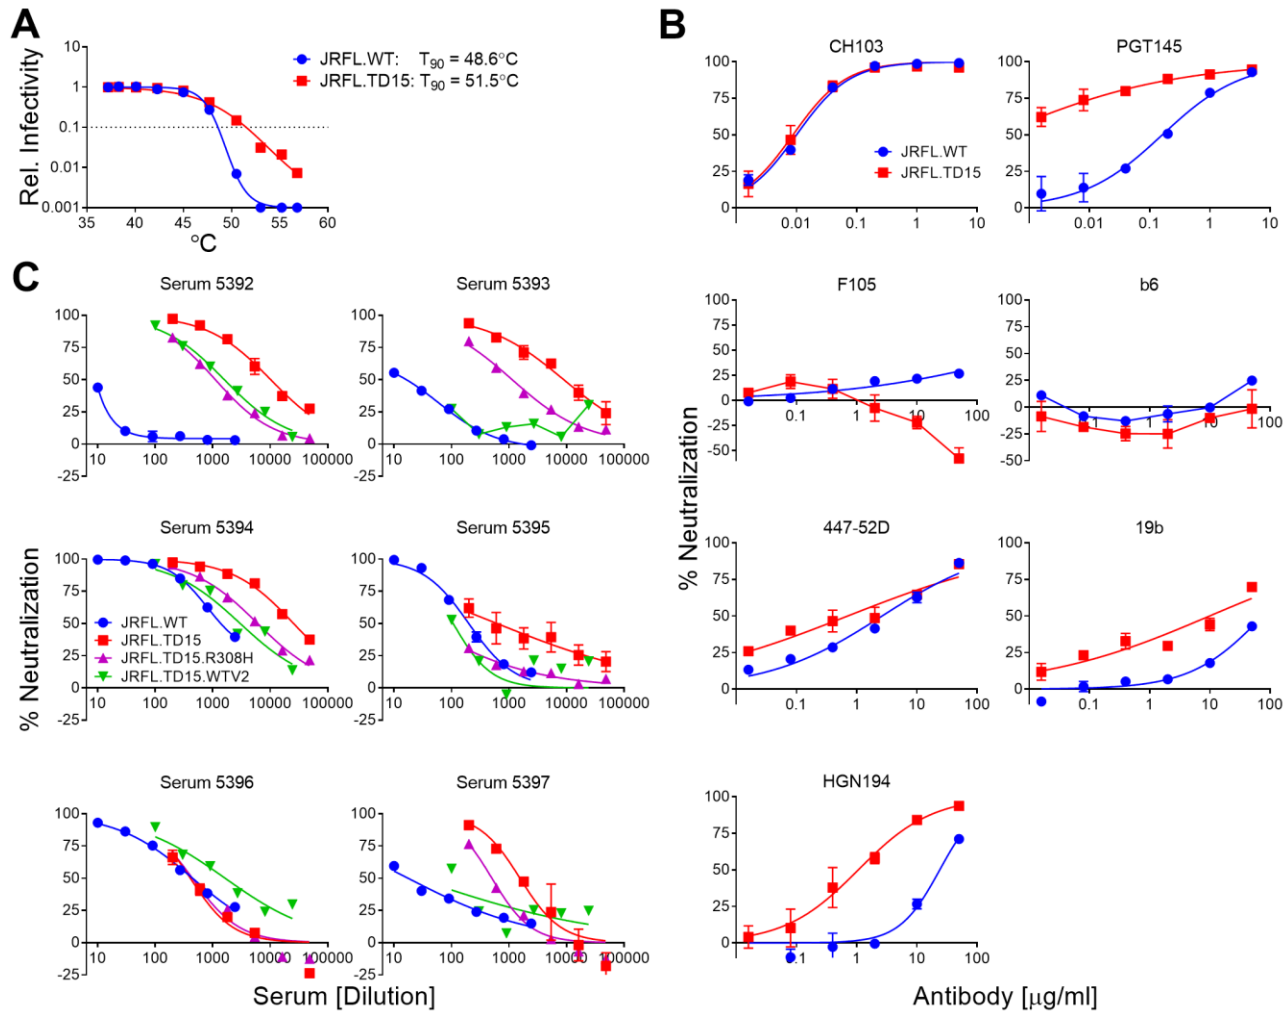

746

747 **Supp. Figure 5. Stability and neutralization sensitivity of HIV JRFL.TD15.** (A) Stability of  
 748 function of JRFL.TD15 and JRFL.WT mEnvs was studied by determining the relative infectivity  
 749 of cognate pseudovirions incubated for an hour at different temperatures; the temperature at  
 750 which infectivity is reduced by 90% ( $T_{90}$ ) is indicated to the left. (B) Neutralization of  
 751 JRFL.TD15 by narrow neutralizing antibodies against V3 (447-52D, 19b, and HGN194) and  
 752 CD4BS (F105 and b6), as well as by bnAbs to the CD4BS (CH103) and to V2 (PGT145). (C)  
 753 MEL-immunized rabbit sera were assayed for neutralization against JRFL.WT, JRFL.TD15 and  
 754 mutants JRFL.TD15.R308H and JRFL.TD15.WTV2 that bear JRFL.WT V3 and V2 domains,  
 755 respectively.

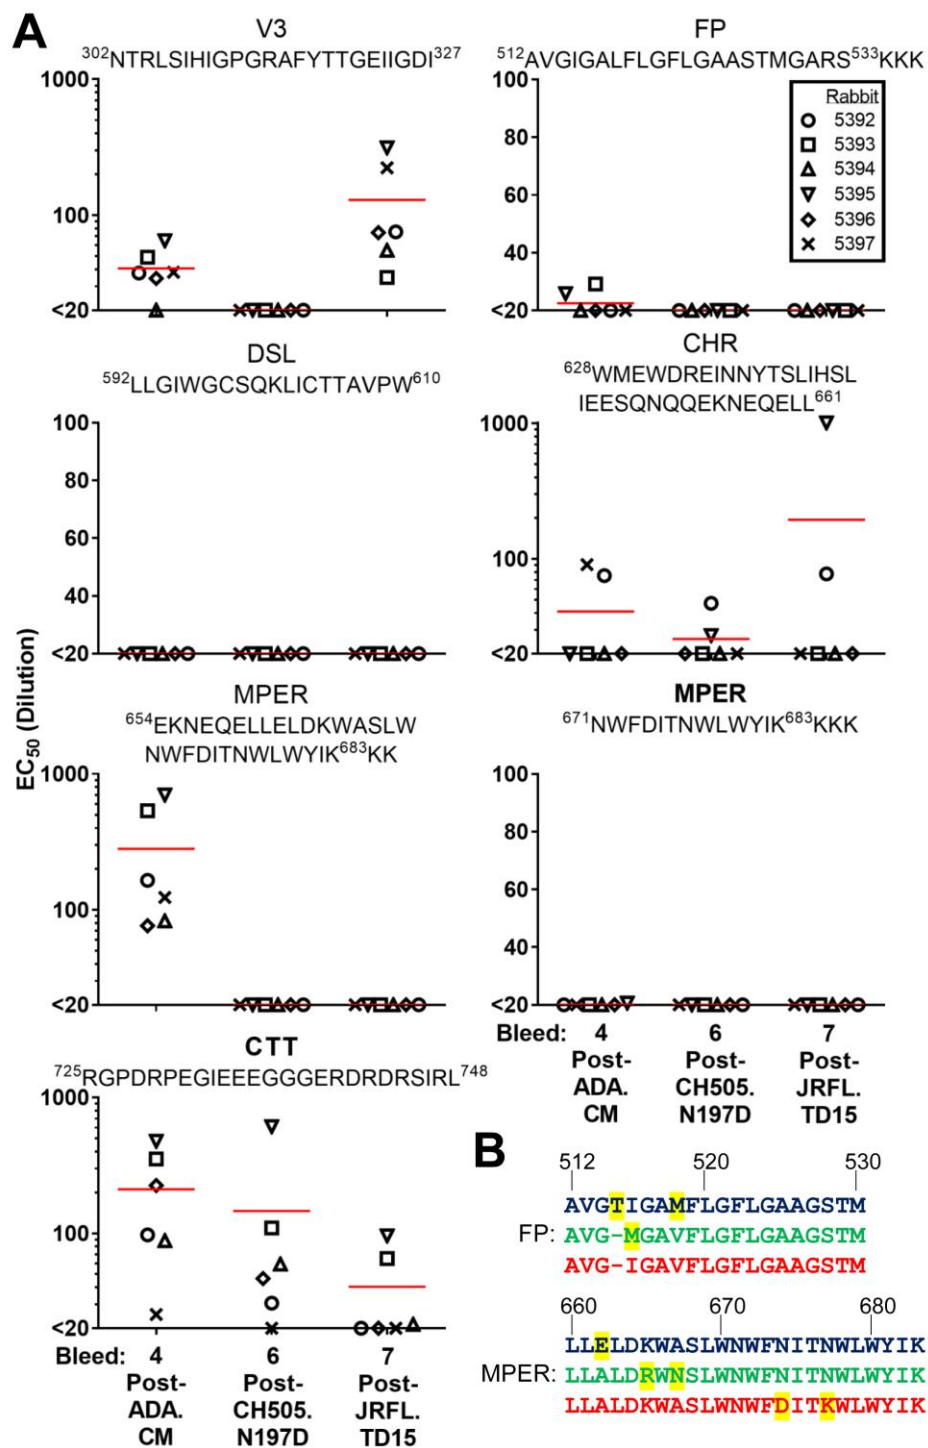

756 **Supp. Figure 6. Binding specificities in sera of MEL immunized rabbits.** (A) Sera from  
 757 bleeds 4 (post-ADA.CM), 6 (post-CH505.N197D) and 7 (post-JRFL.TD15) were tested in an  
 758 ELISA for the ability to bind various antigens and peptides of HIV Env. (B) Alignment of the FP  
 759 (a.a. 512-530) and MPER (a.a. 660-683) of mEnvs used in the sequential immunization.  
 760 ADA.CM sequence is in blue, CH505.N197D sequence is in green, and JRFL.TD15 sequence is  
 761 in red. Residues that differ in one isolate relative to the other two are highlighted in yellow.
